# Supplementary material for: Managing waiting times in diagnostic medical imaging
Source: PubMed Central journal article supplement — BMJ Open. 2012 Dec 14;2(6):e001255. doi: 10.1136/bmjopen-2012-001255 (PMC3533122; doi:10.1136/bmjopen-2012-001255), 2012-12-14
Supplement: bmjopen-2012-001255.draft_revisions.pdf [file bmjopen-2012-001255.draft_revisions.pdf]

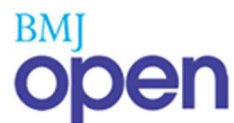

## Managing waiting times in diagnostic medical imaging

|                                                                                                                                                                |                                                                                                                                                                                                                |
|----------------------------------------------------------------------------------------------------------------------------------------------------------------|----------------------------------------------------------------------------------------------------------------------------------------------------------------------------------------------------------------|
| Journal:                                                                                                                                                       | <i>BMJ Open</i>                                                                                                                                                                                                |
| Manuscript ID:                                                                                                                                                 | bmjopen-2012-001255                                                                                                                                                                                            |
| Article Type:                                                                                                                                                  | Research                                                                                                                                                                                                       |
| Date Submitted by the Author:                                                                                                                                  | 04-Apr-2012                                                                                                                                                                                                    |
| Complete List of Authors:                                                                                                                                      | Nuti, Sabina; Scuola Superiore Sant'Anna, Management and Health Laboratory, Institute of Management<br>Vainieri, Milena; Scuola Superiore Sant'Anna, Management and Health Laboratory, Institute of Management |
| <b>Primary Subject Heading</b>:                                                                                                                                | Health policy                                                                                                                                                                                                  |
| Secondary Subject Heading:                                                                                                                                     | Health services research, Health economics                                                                                                                                                                     |
| Keywords:                                                                                                                                                      | HEALTH SERVICES ADMINISTRATION & MANAGEMENT, Organisation of health services < HEALTH SERVICES ADMINISTRATION & MANAGEMENT, Health policy < HEALTH SERVICES ADMINISTRATION & MANAGEMENT                        |
| <p>Note: The following files were submitted by the author for peer review, but cannot be converted to PDF. You must view these files (e.g. movies) online.</p> |                                                                                                                                                                                                                |
| <p>appendix.mht</p>                                                                                                                                            |                                                                                                                                                                                                                |

SCHOLARONE™  
Manuscripts

Only

1  
2  
3 **Title: Managing waiting times in diagnostic medical imaging: a health service research**  
4

5 Authors: Sabina Nuti, Milena Vainieri  
6

7 Institution: Management and Health Laboratory, Institute of Management, Scuola Superiore  
8 Sant'Anna, piazza Martiri delle Libertà,33, 56127 Pisa, Italy.  
9

10 Corresponding author: Sabina Nuti

11 Postal address: Management and Health Laboratory, Institute of Management, Scuola Superiore  
12 Sant'Anna, piazza Martiri delle Libertà,33, 56127 Pisa, Italy.

13 Email address: [snuti@sssup.it](mailto:snuti@sssup.it),

14 Phone number: +39050883996  
15  
16

17 Keywords: total quality management, diagnostic imaging, waiting list, organizational productivity,  
18 organizational decision making, health service administration.  
19

20 Word count (excluding title page, abstract, references, figures and tables) 3936  
21  
22  
23  
24  
25  
26  
27  
28  
29  
30  
31  
32  
33  
34  
35  
36  
37  
38  
39  
40  
41  
42  
43  
44  
45  
46  
47  
48  
49  
50  
51  
52  
53  
54  
55  
56  
57  
58  
59  
60

## Abstract

### Objective

This paper aims to analyze the variation related to the delivery of diagnostic imaging services to suggest possible solutions that may allow the reduction of waiting times, increase the quality of service and reduce the financial costs.

### Design

This study provides a logic model to manage waiting times in a regional context. Waiting times measured per day have been compared on the basis of the variability in the use rates of CT and MRI examinations in Tuscany for the population, as well as on the basis of the capacity offered with respect to the number of radiologists available. The analysis has been performed at the local health authority level to support the decision-making process of local managers.

Setting: diagnostic imaging services, in particular the CT and MRI exams. The study involved the all the 12 local health authorities that provide services for 3.7 million of inhabitants of the Italian Tuscany Region.

Primary and secondary outcome measures:

Participants: Study uses regional administrative data on outpatients and survey data on inpatient diagnostic exams in order to measure productivity.

Primary and secondary outcome measures: The study uses the volume per 1000 inhabitants, days of waiting times and the number of exams per radiologists. Variability has been measured using the traditional standard deviation measures.

### Results

A significant variation in areas considered homogeneous in terms of age, gender or mortality may indicate that the use of radiological services is not optimal and underuse or overuse occurs and that there is room for improvement in the service organization.

### Conclusions

Considering that there is a high level of variability among district use rates and waiting times, this study provides managers with a specific tool to find the cause of the problem, identify a possible solution, assess the financial impact and initiate the eventual reduction of waste.

## Article summary

Article presents the results of a research project that aims to explore factors that explain the variability in waiting times and the use of computed tomography (CT) and magnetic resonance imaging (MRI) examination rates in Tuscany Region (Italy). It aims to analyze the relationships among radiologists productivity, use rates and waiting times.

Key messages of the article are: Results reveal a high level of variability between the LHAs' use rates. Factors that may affect these results do not involve private providers or substitution effects between similar procedures. Monitoring the appropriateness phase of the prescription becomes critical when it is difficult to ensure acceptable waiting times, which could be due to high volumes of the diagnostic imaging services delivered or may depend on inefficiency or a lack of professional resources (e.g. the number of radiologists).

Analyses have discovered that there is a significant negative correlation between percentage of private examinations and radiologists productivity: a better use of resources in terms of productivity can lead to a significant reduction of costs (around 10 millions of euro out of 6,500 millions of the total regional budget).

Strengths and limitations: This study analyzes the variation on diagnostic imaging services throughout different perspectives (volumes, waiting times and productivity). It provides policy makers with a logical model to manage this variation. Limitations of the analysis regard the setting the Tuscany Region.

## Background

The epidemiological changes of the last 30 years have caused a reduction in acute care for populations and an exponential growth in the number of outpatient and diagnostic services. Moreover, technological innovations in the diagnostic sector have made services more efficient, but at the same time more expensive, thus increasing costs.

Citizens and physicians increasingly request diagnostic services, often without considering their possible negative effects, such as radiation caused by CT examinations. It appears that the offer of diagnostic services does not cover the demand from patients, thus causing waiting lists to be increasingly longer and patients to be highly unsatisfied.

Policy makers must therefore face a complex situation resulting from longer waiting times, the increasing demand of diagnostic services from patients and increasing costs.

Which mechanisms may be adopted in order to face such situations and assist managers of public health systems to identify the causes of the problem and possible solutions?

On one hand, the regional health system should provide an adequate number of DI services to grant equity of access to all citizens and should deliver such services in a timely fashion and according to patients' needs. On the other hand, it should reduce the patients' radiation exposure and the inappropriate duplication of exams as much as possible.

The World Health Organization (WHO) argues that the use rates of DI services should be adapted to the local needs and should be determined by (i) the type and size of the hospital; (ii) the number and type of patients: disease burden, inpatients and outpatients; and (iii) the therapeutic capabilities.

Guyatt et al.<sup>1</sup> underlined the importance of accounting for the reassuring effect of an investigation on the wellness of a worried patient, while Hendel<sup>2</sup> suggested that intangible factors, local practice, and clinical judgment must be carefully considered in the DI procedure appropriateness assessment.

Certainly, the huge growth of DI procedures observed in the last years raises concern about a possible overuse of these services<sup>2 3 4 5</sup>. According to the European referral guidelines for imaging, the causes of DI service overuse are multiple: repeated investigations, investigations performed although unlikely to affect patient management and premature or incorrect investigations.

Miller<sup>3</sup> (2005) and Lysdahl and Børretzen<sup>6</sup> observed that the number of supplied DI services is very different among geographical areas and that, often, geographical areas that supply a larger number of DI services do not present better health outcomes for the inhabitants. Song et al.<sup>7</sup> reported that there was no evidence of a survival benefit among people who moved to regions with a higher intensity level of procedures compared to those who moved to lower-intensity regions.

These results suggest that the analysis of the DI services variability across geographical regions could be an important step toward the understanding of the primary determinants of DI procedure growth rates and toward a definition of appropriate use standards. A significant variation in areas considered homogeneous in terms of age, gender or mortality may indicate that use of radiological services is not optimal and underuse or overuse occurs.

This paper presents the results of a research project that aims to explore factors that explain the variability in waiting times and the use of computed tomography (CT) and magnetic resonance imaging (MRI) examination rates in Tuscany, with the aim to support the regional administration planning process regarding resource allocation and setting standards and goals for local health authorities (LHAs).

### The Tuscan context.

The overall economic value of services such as computed tomography (CT) and magnetic resonance imaging (MRI) in Tuscany is 1% greater than the regional budget (6.500 million Euros).

The volume of these services for residents is one of the highest in Italy (Italian Ministry of Health [www.salute.gov.it](http://www.salute.gov.it)). Despite high volumes, the actual offerings in Tuscany seem to not be enough.

In 2010, waiting times in Tuscany were more than 60 days on average; however, for some LHAs, waiting times reached up to 90 days.

Moreover, surveys conducted with the population of Tuscany indicated that waiting times for DI

1  
2  
3 services represent the aspect that is more frequently criticized by citizens. Indeed, waiting lists are  
4 the principal reason for citizens selecting private service<sup>8,9</sup>.

5 Tuscany policy makers consider waiting times to be one of the most important challenges to  
6 achieve, also because the National Government requested these diagnostic services to be delivered  
7 to patients within 30 days (Piano Nazionale di Governo delle Liste di attesa –PNGLA- 2010- 2012).  
8 Considering these premises, the present research investigated the relationship between volumes and  
9 waiting times to find out if long waiting times are determined by high volumes of diagnostic  
10 services delivered to residents, as well as to assess the impact of factors such as the presence of  
11 private suppliers and providers.  
12

### 13 14 **Research questions**

15 As a first step, the research group measured the rate per inhabitant standardized by age, sex and  
16 service delivered (MRI and CT), in benchmarking throughout all of the 12 Tuscan LHAs; great  
17 variability was identified for both of the diagnostic services analyzed (CT use rates from 45 to 88  
18 per 1000 inhabitants and MRI use rates from 56 to 83 per 1000 inhabitants).

19 A similar result was found measuring the waiting times for the same diagnostic services (from 14 to  
20 260 days); the variability appeared to be very great.

21 The results indicate that, although Tuscany is a homogenous territory from a sociodemographic  
22 perspective and represents excellence within the Italian regions in terms of quality of healthcare and  
23 governance<sup>10</sup>, there is great variability within the region in terms of waiting times and DI use rates.  
24 Moreover, the overall monetary value of this variability, measured in terms of the volume of  
25 services delivered above the regional median, has been estimated to be twelve million Euros in  
26 2009, thus suggesting a broad margin of intervention and the need for policy makers to find new  
27 and more efficient ways to evaluate waste and duplications in the health service supply.

28 Geographical variation in the DI user rates may constitute overuse or underuse with a consequent  
29 likely inappropriateness of the service<sup>6</sup>. Bhargavan and Sunshine<sup>11</sup> highlighted great variability in  
30 the provision of DI services across areas and suggested that the use of appropriateness criteria, such  
31 as those defined by the ACR, may minimize these differences. Moreover, they explored this  
32 variability to highlight the state-level variables that affect it most, and they observed that the greater  
33 the number of Medicare providers, the greater the DI investigation rate per 1000 inhabitants.  
34 However, it is worth highlighting that the variability across regions could be affected by other  
35 factors like the availability of diagnostic technologies, socioeconomic factors (i.e., education,  
36 income) or the number of radiologists in the region<sup>6,12</sup>. Moreover, Lysdahl and Børretzen<sup>6</sup> observed  
37 that each area may present a propensity toward a particular procedure considered a reasonable  
38 approach for a specific indication, which may lead each area to present a substitution effect among  
39 procedures types. On the contrary, it is found that the high use of one modality does not correspond  
40 with low use of an alternative modality for specific organs (locations), supporting the assumption  
41 that overuse really exists in high-use areas, thus leading to potentially inappropriate resource  
42 allocation.  
43

44 In the Tuscan region in Italy, diagnostic imaging services far from the regional median use rate are  
45 inappropriate because they can lead to an excessive number of radiation exposures (in the case that  
46 they are above the median) or a lack of services (in the case that they are lower than the median)<sup>13</sup>.

47 This assumption yields some disadvantages because it does not take into account differences in  
48 medical procedures, where any decision involves a certain degree of discretion, the disease burden  
49 of particular areas, or patient preferences and outcomes<sup>14</sup>. However, Lysdahl and Børretzen<sup>6</sup>  
50 observed that the number of supplied DI services did not correspond to better health outcomes for  
51 inhabitants. Moreover, Song et al.<sup>7</sup> found that the mortality rate was not lower in areas presenting a  
52 high intensity of practices, as one could expect. Low-intensity and high-intensity areas present  
53 similar outcomes and, after three years, there is no evidence of a survival benefit among people who  
54 moved to higher intensity regions compared to those who moved to low-intensity regions.

55 Given these premises, the present study intended to answer the following questions (RQs):  
56  
57  
58  
59  
60

1  
2  
3  
4 RQ1: Does variability in the DI rate depend on the presence of private medical providers?

5 RQ2: Is there a substitution effect among diagnostic procedures?

6 RQ3: Is it a problem of procedure mix?

7 RQ4: What is the relationship between the volumes delivered and the waiting times?

8 RQ5: Does the number of radiologists available for each LHA affect the volumes?

9 RQ6: What is the relationship between radiologist productivity and the volumes delivered?

10  
11  
12 This paper presents some first evidence regarding the questions suggested and proposes a method to  
13 enhance the professional consciousness of specialists toward better resource allocation and  
14 performance management.

## 15 16 **Methods**

17 This study follows the guidelines of an “interventionist research approach”. This approach aims to  
18 solve problems through the construction of models, diagrams, plans, organizations, etc., by means  
19 of direct involvement of the researchers with the actors in “participant observations” in the field<sup>15</sup>.  
20 This method is used in a variety of fields: technical sciences, mathematics, operations analysis,  
21 clinical medicine and management control<sup>16</sup>.

22 In this study, professionals involved in detangling the DI variability and the management of waiting  
23 times included both Tuscan Health Authorities and various other actors: radiologists, technical staff  
24 and management staff (such as the health and cost analysts).

25 Professionals revealed the principal problems of managing waiting times and the variability in CT  
26 and MRI use across the health authorities.

27 Researchers facilitated the process, conducted the project while pointing out the questions and the  
28 research hypothesis, looked for articles that may support the perceived determinants of variability,  
29 collected data and ran statistical analyses to help professionals identify critical factors.

30 The calculations were based on the Tuscan outpatient dataset and on the Health Authority data on  
31 DI inpatients services. Finally, scans and personnel data were collected by researchers via surveys.

## 32 33 34 **Results**

35 The starting point of this research was the observation of the large variation in the use rates of  
36 diagnostic imaging procedures in Tuscany across the Local Health Authorities (LHAs), which is  
37 even more drastic across districts (Figure 1).

38  
39  
40  
41  
42 Figure 1 – CT and MRI use rates per 1000 inhabitants in the Tuscan districts.

43  
44 The Tuscan outpatient dataset allows, for each LHA and district, the computation of the rates of CT  
45 and MRI use per 1000 inhabitants, standardized by age and sex. In particular, the variability  
46 between the districts has been measured by the standard deviation and the high-low ratio that is the  
47 rate between the LHA’s highest and the LHA’s lowest rates within the region. The first measure is  
48 the traditional measure of variability, and the second one provides an immediate indication of the  
49 dimension of the problem; these results are more effective from a managerial point of view,  
50 although it is very sensitive to outliers.

51  
52 To investigate if the presence of private providers affects the variability (RQ1), the examination rate  
53 and its standard deviation have been computed highlighting whether the provider was private or  
54 public. The correlation analysis between the use rates and the percentage of examinations provided  
55 by private institutions demonstrates that the high use rates do not significantly depend on the private  
56 sector’s activity, both for MRI and CT.



1  
2  
3 The fact that the presence of the private sector does not influence the variability confirms that it is  
4 not the private providers that have the responsibility of increasing volumes because their production  
5 is negotiated with the Tuscan LHAs, which decide the percentage of services to be provided by the  
6 private sector.

7 Regarding RQ2, scholars suggest that variability could be due to substitution effects between  
8 different modalities. Low use rates of one modality in the examination of specific organs could  
9 generally correspond to high use rates of alternative modalities. However, the data do not support  
10 this hypothesis; the correlation matrix between possibly substitutable modalities of analysis (e.g.,  
11 the CT and MRI of the superior abdomen, the CT and MRI of the head and brain, the CT and MRI  
12 of the rachis and spine or the CT and MRI of the facial massive) indicates that there is no  
13 statistically significant correlation between them (Table 1). A significant negative correlation would  
14 have suggested that high rates of one modality correspond to low rates of the other, suggesting a  
15 likely substitution effect between them.  
16  
17

18 Table 1 – Substitution effect between four couples.  
19  
20

21  
22 This result is comforting because there should be specific guidelines on the use of each diagnostic  
23 modality, as radiologists note. In the same vein, Lysdahl and Borretzen<sup>6</sup> found a significant positive  
24 correlation between the uses of different modalities for specific organ examinations, in particular  
25 with regard to MRI and CT examinations, avoiding the chance for substitutability.  
26

27 To understand if variability may be caused by an excessive use of a limited number of specific  
28 modalities of examination (RQ3), a procedure mix has been analyzed. The procedure mix analysis  
29 indicates that higher use rates of CT or MRI are driven in particular by specific types of procedures,  
30 highlighting a possible problem of prescription. To explore this issue, the twenty more frequent  
31 examinations of CT and MRI were considered; these constitute approximately 90% of the total CT  
32 and MRI examinations performed in Tuscany in 2009.  
33

34 Taking into account both the standard deviation and the high/low ratio measures of variability, there  
35 are certain types of examinations that present greater variability, including the CT of the head/brain,  
36 the musculoskeletal MRI and the CT of the superior abdomen. For these types of examinations,  
37 greater risks of inappropriateness and greater margins for disinvestment and reallocation could be  
38 expected.  
39

40 These results are confirmed when the monetary value is linked to variability.

41 Appendix 1 for the CT examinations and Appendix 2 for the MRI examinations highlight the  
42 critical area of inappropriateness for each district, providing managers with the amount of leeway  
43 they could obtain if they performed at the regional median (following a similar approach adopted by  
44 Nuti et al.<sup>17</sup> for potentially inappropriate hospitalizations).

45 For example, in the Apuane district, 90% of its leeway is concentrated on the musculoskeletal MRI.  
46 At the regional level, 57% of the potential savings is concentrated in the musculoskeletal and  
47 backbone MRI examinations, while 42% of it is concentrated on the rachis and complete abdomen  
48 with contrast CT examinations.  
49

50 The leeway only represents potential savings because they depend on the real costs incurred for  
51 providing DI examinations; moreover, the personnel (physicians, radiologists and technical staff)  
52 cannot be fired, but they can be reallocated to other services.

53 To obtain evidence for RQ4 (i.e., the relationship between volumes delivered and waiting times),  
54 our research group, with the collaboration of professionals from the radiological and managerial  
55 fields from all Tuscan LHAs, developed a two-dimensional matrix to measure the waiting times and  
56 the service use rate per inhabitant, standardized by age, sex and the service delivered (MRI or CT).  
57 The objective of this work was to develop an efficient tool to identify the causes of the problem and  
58 find the most appropriate solutions.  
59  
60

1  
2  
3 The matrix developed by our research group allows the identification of four quadrants:

- 4 1. short waiting times and high volumes per inhabitant
- 5 2. short waiting times and low volumes delivered
- 6 3. long waiting times and high volumes per inhabitant
- 7 4. long waiting times and low volumes delivered

8  
9 This first classification yields the following hypothesis:

10 The institutions that belong to the first quadrant could risk delivering inappropriate services and/or  
11 have an excessive amount of resources at their disposal.

12 The institutions belonging to the second quadrant could risk substantially decreasing their supply of  
13 services or may face a problem in the quality of their services if their citizens decide to seek such  
14 services at other institutions.

15 The institutions that belong to the third quadrant could face problems in terms of the  
16 appropriateness and production efficiency.

17 Finally, the institutions belonging to the fourth quadrant could face difficulties in terms of the  
18 efficiency or inappropriate amount of resources.

19 When this matrix is applied to the results obtained by the Tuscan health authorities, a high rate of  
20 variability is registered.

21  
22  
23 Figure 2 reports the matrix for waiting times and volumes of CT.

24  
25  
26  
27  
28 Figure 2 illustrates that LHAs are positioned in all four of the quadrants; moreover, it seems that  
29 high use rates are not correlated with greater waiting times, and this result is also confirmed by the  
30 Pearson correlation coefficient ( $p > 0.05$ ).

31  
32  
33 Evidence regarding the relationship between the number of radiologists and the volumes per  
34 habitant and volumes produced (questions RQ5 and RQ6) has been based on a large study  
35 conducted with professionals that included factors such as the ages of the patients and the health  
36 status in the analysis.

37 In particular, productivity indices were weighted on the basis of patients' characteristics (age) and  
38 health status. Indeed, the Italian radiologist workload report of 2006<sup>18</sup> argued that the time spent  
39 running examinations for younger patients (less than 5 years of age) is 25% greater than the time  
40 spent for other patients (weight=1.25), while the time spent for elderly patients (older than 79 years)  
41 is 15% greater (weight=1.15). Patients coming from the Emergency Department require the  
42 presence of radiologists and technicians for a longer period of time (estimated at 25%), as well as  
43 patients who are already hospitalized (time is estimated at 15%). Another focus of the analysis was  
44 to identify personnel dedicated to CT services. A full-time equivalent personnel dedicated to CT  
45 services was estimated using the workload table of the 2007 report for the current DI examinations  
46 (both inpatients and outpatients) per health authority.

47 These analyses were presented and discussed with the Italian National Scientific Community of  
48 Radiologists (SNR-SIRM) in 2011.

49  
50  
51  
52 The increase of supply throughout the introduction of more scans or radiologists could lead to both  
53 a reduction in waiting times and an increase in volumes (indeed, capacity is one of the factors that  
54 could explain the variability, as reported by scholars).

55 For CT services in Tuscany, the number of radiologists and technical staff per inhabitant and the  
56 volumes per inhabitant provided by public providers appear to influence neither the demand of the  
57 services nor the waiting times. The fact that there is no correlation between the scans/radiologists  
58 and waiting times could lead to the hypothesis that the management of waiting times cannot be  
59  
60



1  
2  
3 generalized and will depend on other factors that are strictly related to the local organizational  
4 decisions.

5  
6 Waiting times could be reduced by using the productive capacity in a better way, such as enhancing  
7 the opening hours of scans to perform more examinations per scan and increase the number of  
8 examinations per radiologist.

9  
10 Another strategy is to ask the private sector to provide some services. In theory, the presence of the  
11 private sector should smooth over waiting times; it is expected that LHAs choose to contract  
12 services out once their production capacity is high. On the contrary, this strategy appears to not be  
13 cost-effective in Tuscany; in fact, correlation analyses highlighted that there is a statistically  
14 significant negative correlation between the percentage of volumes provided by private suppliers  
15 and the radiologist productivity score: a higher percentage of private suppliers corresponds to a  
16 lower productivity score for radiologists, as reported in Figure 3.  
17  
18

19  
20 Figure 3 – CT per radiologist and the percentage of examinations performed by private institutions.  
21  
22  
23  
24

25 The results indicate that in Tuscany, the private sector does not influence the differences between  
26 the examination rates, and variability is even greater when only public providers are considered.

27 In fact, LHAs where the productivity per radiologist is lower could increase the volume and reduce  
28 the use of private providers; LHAs could save 6 million Euros for CT examinations and 10 million  
29 Euros for MRI examinations (Table 2).

30 Considering the tie of the actual number of scans at their maximum level of productivity  
31 (identified by the greatest number of examinations per scan run in 2010 by LHAs), the leeway  
32 remains the same for the CT services while it slows down to 5 million euros for MRI, suggesting  
33 that for CT services, there is greater room for improving the productivity of both personnel and  
34 scans.  
35  
36  
37  
38  
39

40 Table 2 – The leeway for MRI and CT services due to a better productivity and a reduction of  
41 private services  
42

### 43 **Conclusions**

44 This paper provides an analysis of the variability in the use rates of CT and MRI examinations in  
45 Tuscany. Variability has been estimated through two measures: the high/low ratios between the  
46 recorded highest and lowest rates and the traditional standard deviation measures. The analysis has  
47 been performed at the LHA level to support the decision-making process of local managers.

48 Results reveal a high level of variability between the LHAs' use rates. Why do some residents use  
49 these DI services much more than others? Factors that may affect these results do not involve  
50 private providers or substitution effects between similar procedures; in fact, some types of  
51 examinations (e.g., CTs of the head) could be driven by a problem with prescriptions. Monitoring  
52 the appropriateness phase of the prescription becomes critical when it is difficult to ensure  
53 acceptable waiting times, which could be due to high volumes of the DI delivered or may depend on  
54 inefficiency or a lack of professional resources (e.g., radiologists).

55 Moreover, these analyses have discovered that the access to private suppliers is not optimized, even  
56 though they do not influence the presence of high use rates. Better use of resources in terms of  
57 productivity can lead to a significant reduction of costs.  
58  
59  
60

1  
2  
3 The aim of health policies should be to provide high quality services for all citizens on an equal  
4 basis, as well as to guarantee an efficient system with little waste and duplication<sup>19</sup>. In the case of  
5 diagnostic imaging, avoiding waste and duplication becomes fundamental given the detrimental  
6 effects of these exams on the patients' health.

7 This approach allows each LHA to identify the critical areas controlling the variability in use rates  
8 and to find out if waiting times are determined by inefficiencies, a lack of appropriateness in the  
9 prescribing phase or a lack of professional resources, which will help decision makers define the  
10 priorities of intervention. Hence, the important role of enhancing the specialists' competence and  
11 economic consciousness through focus groups will aim to exploit the learning opportunities with  
12 comparisons to the best practices. To improve performance, financial incentives may be useful, but  
13 not sufficient, especially if the performance targets are unrealistically high. Benchmarking is also a  
14 useful way to identify best practices and to build achievable targets; moreover, peer pressure can  
15 provide incentives that financial rewards cannot<sup>20 21 22</sup>.

16 The matrix proposed in this paper and the analyses on productivity, the number of scans/personnel  
17 and the percentage of examinations provided by private institutions can help policy makers and top  
18 managers decide how to cope with long waiting times. The matrix and the analyses aim to help top  
19 managers understand where to focus their actions for reorganization. Moreover, it can be a tool that  
20 helps top managers and policy makers discuss with professionals how to cope with the variability  
21 and waiting times throughout the analyses of data. Indeed, Bevan et al.<sup>23</sup> suggested using and  
22 discussing data in benchmarking to question professional discretion and to manage variation in  
23 healthcare.  
24  
25  
26  
27  
28  
29  
30  
31  
32  
33  
34  
35  
36  
37  
38  
39  
40  
41  
42  
43  
44  
45  
46  
47  
48  
49  
50  
51  
52  
53  
54  
55  
56  
57  
58  
59  
60

## Tables

Table 1 – Substitution effect between four couples.

| Couples | Investigations     | CT facial massive | MRI facial massive | MRI backbone | CT rachis | CT head     | MRI brain | CT sup. abdomen | MRI sup. abdomen |
|---------|--------------------|-------------------|--------------------|--------------|-----------|-------------|-----------|-----------------|------------------|
| 1       | CT facial massive  | 1.00              |                    |              |           |             |           |                 |                  |
| 1       | MRI facial massive | <b>-0.18</b>      | 1.00               |              |           |             |           |                 |                  |
| 2       | MRI backbone       | -0.11             | 0.69*              | 1.00         |           |             |           |                 |                  |
| 2       | CT rachis          | 0.13              | -0.11              | <b>-0.25</b> | 1.00      |             |           |                 |                  |
| 3       | CT head            | 0.44*             | -0.13              | -0.18        | 0.36*     | 1.00        |           |                 |                  |
| 3       | MRI brain          | -0.05             | 0.23               | 0.21         | 0.15      | <b>0.14</b> | 1.00      |                 |                  |
| 4       | CT sup. abdomen    | 0.43*             | 0.11               | 0.30         | 0.16      | 0.20        | 0.04      | 1.00            |                  |
| 4       | MRI sup. abdomen   | -0.18             | 0.56*              | 0.71*        | 0.09      | -0.21       | -0.07     | <b>0.31</b>     | 1.00             |

\* p&lt;0.01

Table 2 – The leeway for MRI and CT services due to a better productivity and a reduction of private services

| LHA            | MRI Leeway   | CT Leeway   |
|----------------|--------------|-------------|
| 101            | € 214,165    | € 121,438   |
| 102            | € 975,477    | € 418,536   |
| 103            | € 913,338    | € 450,501   |
| 104            | € 1,292,383  | € 1,302,740 |
| 105            | € 817,325    | € 160,186   |
| 106            | € 2,254      | € 93,594    |
| 107            |              | € 95,726    |
| 108            | € 56,670     |             |
| 109            | € 555,295    | € 6,804     |
| 110            | € 4,569,327  | € 2,532,735 |
| 111            | € 695,074    | € 479,018   |
| 112            | € 392,814    | € 337,967   |
| Tuscany Region | € 10,484,122 | € 5,999,245 |

### Acknowledgements

We thank Dr. Claudio Vignali (Director of the radiology department of the LHA 12 of Viareggio), Daniele Di Feo (responsible for the radiologist technical staff of Meyer teaching hospital) and all the LHAs' management for their worthy suggestions and collaboration. We also thank the participants of the "Wennberg International Collaborative Conference" held in London in September 2010. A particular acknowledgement to Prof. Gwyn Bevan and Prof. David C. Goodman for their comments on the earlier version of this paper.

For peer review only

## References

1. Guyatt GH, Tugwell PX, Feeny DH, Haynes RB, Drummond M. A framework for clinical evaluation of diagnostic technologies. *Canadian Medical Association Journal* 1986; 134:587-94.
2. Hendel RC. Utilization Management of Cardiovascular Imaging: Pre-certification and Appropriateness. *Journal of the American college of Cardiology: Cardiovascular Imaging* 2008;1:241-8.
3. Miller MM. MedPAC recommendations on imaging services. Medicare Payment Advisory Commission, 2005.
4. Blackmore CC. Defining Quality in Radiology. *The Journal of the American College of Radiology* 2007;4:217-23.
5. Smith-Bindman R, Miglioretti DL, Larson EB. Rising use of diagnostic medical imaging in a large integrated health system. *Health Affairs* 2008;27(6): 1491-1502
6. Lysdahl K.B. and Børretzen I. Geographical variation in radiological services: nationwide survey. *BMC Health Services Research*. 2007;7-21
7. Song Y, Skinner J, Bynum J, Sutherland J, Wennberg JE, Fisher ES. Regional Variation in Diagnostic Procedures. *The New England Journal Of Medicine*, 2010. 363(1): 45-53
8. Nuti. I cittadini toscani e i servizi sanitari presenti sul territorio: MMG, PLS, Attività Ambulatoriale e Diagnostica – Anno 2009. Laboratorio Management e Sanità, 2009.
9. Vainieri M. Che cosa influenza la soddisfazione dei cittadini toscani nei servizi territoriali di base? *Salute e Territorio* 2006;156: 137-156
10. Censis. I modelli decisionali nella sanità locale. Roma, 2008.
11. Bhargavan M, Sunshine JH. Utilization of radiology services in the United States: levels and trends in modalities, regions and populations. *Radiology* 2005; 234:824-832.
12. Lysdahl KB, Hofmann BM. What causes increasing and unnecessary use of radiological investigations? A survey of radiologists' perceptions. *BMC Health Services Research* 2009; 9:155
13. Nuti S, Marcacci L. Il sistema di valutazione della performance della sanità Toscana –report 2009. Pisa: Edizioni ETS, 2011.
14. Wennberg EJ. Tracking medicine. Oxford: University Press, 2010.
15. Jonsson S, Lukka K. Doing interventionist research in management accounting. Goteborg: Gothenburg Research Institute, 2005.
16. Kasanen E, Lukka K, Siitonen A. The constructive approach in management accounting research. *J Manag Acc Res* 1993;5(Fall):243-64
17. Nuti S, Vainieri M, Bonini A. Disinvestment for re-allocation: A process to identify priorities in healthcare. *Health Policy* 2010; 95:137-43.
18. Sirm-Snr. Metodologia di determinazione dei volumi di attività e della produttività dei medici radiologi- Nomenclatore Sirm – Snr Delle Prestazioni Radiologiche. Genova: OMICRON, 2006.
19. Blank RH, Burau V. Comparative health policy, Palgrave Macmillan, 2010.
20. Lee TH. Turning doctors into leaders. *Harvard Business Review*. 2010; April:50-8.
21. Hibbard JH, Stockard J, Tusler M. Does Publicizing Hospital Performance Stimulate Quality Improvement Efforts? *Health Affairs* 2003; 22(2): 84-94
22. Bevan G, Hood C. What's Measured is What Matters: Targets and Gaming in the English Public Health Care System. *Public Administration* 2006;84(3): 517-38.
23. Bevan G, Hollinghurst S, Benton P, Spark V, Sanderson H, Franklin D. Using information on variation in rates of supply to question professional discretion in public services. *Financial Accountability & Management* 2004; 20(1):1-17.



1  
2  
3  
4  
5  
6  
7  
8  
9  
10  
11  
12  
13  
14  
15  
16  
17  
18  
19  
20  
21  
22  
23  
24  
25  
26  
27  
28  
29  
30  
31  
32  
33  
34  
35  
36  
37  
38  
39  
40  
41  
42  
43  
44  
45  
46  
47  
48  
49  
50  
51  
52  
53  
54  
55  
56  
57  
58  
59  
60

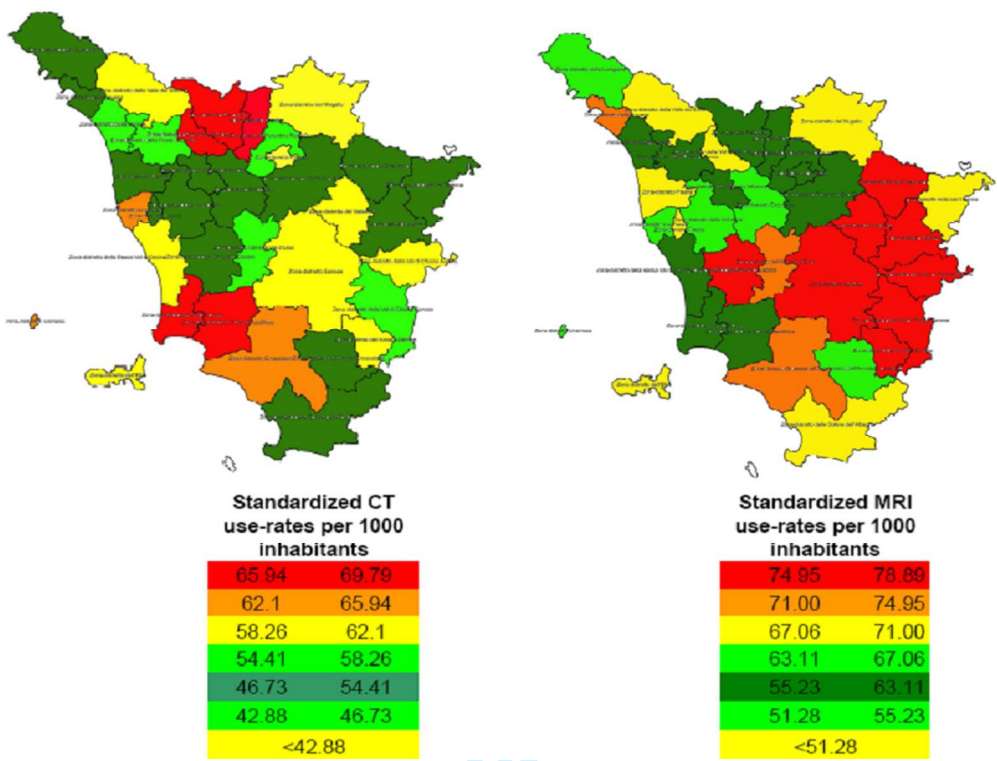

Review only

1  
2  
3  
4  
5  
6  
7  
8  
9  
10  
11  
12  
13  
14  
15  
16  
17  
18  
19  
20  
21  
22  
23  
24  
25  
26  
27  
28  
29  
30  
31  
32  
33  
34  
35  
36  
37  
38  
39  
40  
41  
42  
43  
44  
45  
46  
47  
48  
49  
50  
51  
52  
53  
54  
55  
56  
57  
58  
59  
60

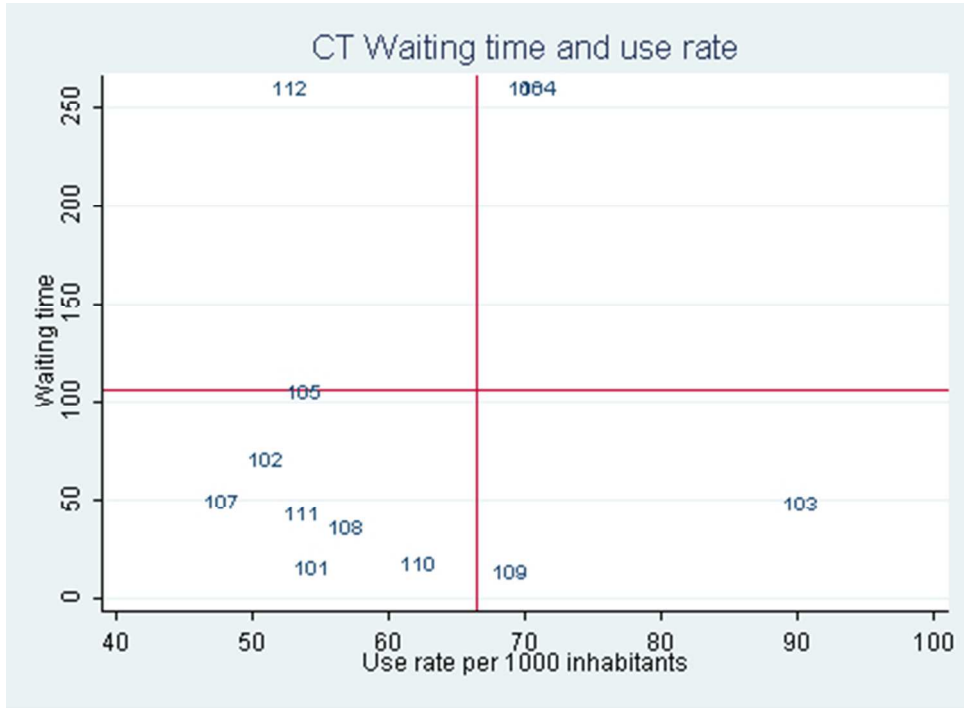

170x124mm (72 x 72 DPI)

view only

1  
2  
3  
4  
5  
6  
7  
8  
9  
10  
11  
12  
13  
14  
15  
16  
17  
18  
19  
20  
21  
22  
23  
24  
25  
26  
27  
28  
29  
30  
31  
32  
33  
34  
35  
36  
37  
38  
39  
40  
41  
42  
43  
44  
45  
46  
47  
48  
49  
50  
51  
52  
53  
54  
55  
56  
57  
58  
59  
60

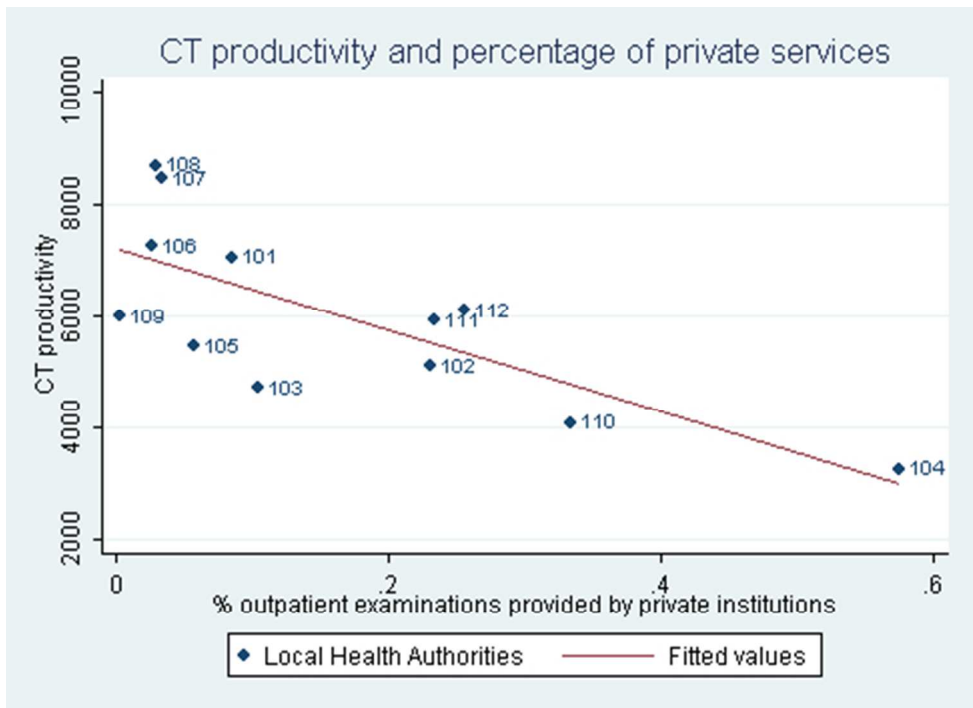

170x124mm (72 x 72 DPI)

view only



## Managing waiting times in diagnostic medical imaging

|                                                                                                                                                                |                                                                                                                                                                                                              |
|----------------------------------------------------------------------------------------------------------------------------------------------------------------|--------------------------------------------------------------------------------------------------------------------------------------------------------------------------------------------------------------|
| Journal:                                                                                                                                                       | <i>BMJ Open</i>                                                                                                                                                                                              |
| Manuscript ID:                                                                                                                                                 | bmjopen-2012-001255.R1                                                                                                                                                                                       |
| Article Type:                                                                                                                                                  | Research                                                                                                                                                                                                     |
| Date Submitted by the Author:                                                                                                                                  | 11-Oct-2012                                                                                                                                                                                                  |
| Complete List of Authors:                                                                                                                                      | Nuti, Sabina; Scuola Superiore Sant'Anna, Laboratorio Management e Sanità, Institute of Management<br>Vainieri, Milena; Scuola Superiore Sant'Anna, Laboratorio Management e Sanità, Institute of Management |
| <b>Primary Subject Heading</b>:                                                                                                                                | Health policy                                                                                                                                                                                                |
| Secondary Subject Heading:                                                                                                                                     | Health services research, Health economics                                                                                                                                                                   |
| Keywords:                                                                                                                                                      | HEALTH SERVICES ADMINISTRATION & MANAGEMENT, Organisation of health services < HEALTH SERVICES ADMINISTRATION & MANAGEMENT, Health policy < HEALTH SERVICES ADMINISTRATION & MANAGEMENT                      |
| <p>Note: The following files were submitted by the author for peer review, but cannot be converted to PDF. You must view these files (e.g. movies) online.</p> |                                                                                                                                                                                                              |
| <p>appendix.mht</p>                                                                                                                                            |                                                                                                                                                                                                              |

SCHOLARONE™  
Manuscripts

only

1  
2  
3 **Title: Managing waiting times in diagnostic medical imaging.**  
4

5 Authors: Sabina Nuti and Milena Vainieri  
6

7 Institution: Laboratorio Management e Sanità , Institute of Management, Scuola Superiore  
8 Sant'Anna, Piazza Martiri della Libertà,24, 56127 Pisa, Italy.  
9

10 Corresponding author: Sabina Nuti

11 Postal address:Laboratorio Management e Sanità , Institute of Management, Scuola Superiore  
12 Sant'Anna, Piazza Martiri della Libertà,24, 56127 Pisa, Italy.

13 Email address: [snuti@sssup.it](mailto:snuti@sssup.it),

14 Phone number: +39050883996  
15  
16

17 Keywords: total quality management, diagnostic imaging, waiting list, organizational productivity,  
18 organizational decision making, health service administration.  
19

20 Word count (excluding title page, abstract, references, figures and tables) 4564  
21  
22  
23  
24  
25  
26  
27  
28  
29  
30  
31  
32  
33  
34  
35  
36  
37  
38  
39  
40  
41  
42  
43  
44  
45  
46  
47  
48  
49  
50  
51  
52  
53  
54  
55  
56  
57  
58  
59  
60



## Abstract

### Objective

This paper aims to analyze the variation in the delivery of diagnostic imaging services in order to suggest possible solutions for the reduction of waiting times, increase the quality of services and reduce financial costs.

### Design

This study provides a logic model to manage waiting times in a regional context. Waiting times measured per day were compared on the basis of the variability in the use rates of CT and MRI examinations in Tuscany for the population, as well as on the basis of the capacity offered with respect to the number of radiologists available. The analysis was performed at the local health authority level to support the decision-making process of local managers.

Setting: diagnostic imaging services, in particular the CT and MRI exams. The study involved all the 12 local health authorities that provide services for 3.7 million inhabitants of the Italian Tuscany Region.

Primary and secondary outcome measures:

Participants: The study uses regional administrative data on outpatients and survey data on inpatient diagnostic exams in order to measure productivity.

Primary and secondary outcome measures: The study uses the volumes per 1000 inhabitants, the days of waiting times and the number of exams per radiologist. Variability was measured using the traditional standard deviation measures.

### Results

A significant variation in areas considered homogeneous in terms of age, gender or mortality may indicate that the use of radiological services is not optimal and underuse or overuse occurs and that there is room for improvement in the service organization.

### Conclusions

Considering that there is a high level of variability among district use rates and waiting times, this study provides managers with a specific tool to find the cause of the problem, identify a possible solution, assess the financial impact and initiate the eventual reduction of waste.

## Article summary

Article focus: Which factors explain the variability in waiting times and in the use of computed tomography (CT) and magnetic resonance imaging (MRI) examination rates? This article aims to analyze the relationships among radiologists' productivity, use rates and waiting times in the Tuscan Region. Moreover, it proposes a logical tool to help managers deal with this complex issue.

Key messages: The results reveal a high level of variability among the DI use rates of LHAs. The factors that may affect these results do not involve private providers or substitution effects between similar procedures. Monitoring the appropriateness phase of the prescription becomes critical when it is difficult to ensure acceptable waiting times which could be due to high volumes of the diagnostic imaging services delivered or may depend on inefficiency or a lack of professional resources (e.g. the number of radiologists). In Tuscany there is no correlation among scans/radiologists, volumes and waiting times. This could lead to the hypothesis that the management of waiting times cannot be generalized and depends on other factors that are strictly related to the local organizational decisions. Finally, the paper proposes a logical framework to help policy makers and managers cope with waiting times and appropriateness.

Strengths and limitations: This study analyzes the variation on diagnostic imaging services throughout different perspectives (volumes, waiting times and productivity). It provides policy makers with a logical model to manage this variation. Limitations regard the generalization of results, as part of them may be referred only to the organizational features of the region analyzed (as for the productivity).

## Background

The epidemiological changes of the last 30 years have caused a reduction in acute care for populations and an exponential growth in the number of outpatient and diagnostic services. Moreover, technological innovations in the diagnostic sector have made services more efficient, but at the same time more expensive, thus increasing costs.

Citizens and physicians increasingly request diagnostic services, often without considering their possible negative effects, such as radiation caused by CT examinations. It appears that the offer of diagnostic services does not cover the demand from patients, thus causing waiting lists to be increasingly longer and patients to be highly unsatisfied.

Policy makers must therefore face a complex situation resulting from longer waiting times, the increasing demand of diagnostic services from patients and increasing costs.

Which mechanisms may be adopted in order to face such situations and assist managers of public health systems to identify the causes of the problem and possible solutions?

On one hand, the regional health system, with a universal coverage mission, should provide an adequate number of DI services to grant equity of access to all citizens and should deliver such services in a timely fashion and according to patients' needs. On the other hand, it should reduce the patients' radiation exposure and the inappropriate duplication of exams as much as possible.

The World Health Organization (WHO) argues that the use rates of DI services should be adapted to the local needs and should be determined by (i) the type and size of the hospital; (ii) the number and type of patients: disease burden, inpatients and outpatients; and (iii) the therapeutic capabilities. Guyatt et al.<sup>1</sup> underlined the importance of accounting for the reassuring effect of an investigation on the wellness of a worried patient, while Hendel<sup>2</sup> suggested that intangible factors, local practice and clinical judgment must be carefully considered in the DI procedure appropriateness assessment.

Certainly, the huge growth of DI procedures observed in the last years raises concern about a possible overuse of these services<sup>2 3 4 5</sup>. According to the European referral guidelines for imaging, the causes of DI service overuse are multiple: repeated investigations, investigations performed although unlikely to affect patient management and premature or incorrect investigations.

Miller<sup>3</sup> (2005) and Lysdahl and Børretzen<sup>6</sup> observed that the number of supplied DI services is very different among geographical areas and that, often, geographical areas that supply a larger number of DI services do not present better health outcomes for the inhabitants. Song et al.<sup>7</sup> reported that there was no evidence of a survival benefit among people who moved to regions with a higher intensity level of procedures compared to those who moved to lower-intensity regions.

These results suggest that the analysis of the DI services variability across geographical regions could be an important step toward the understanding of the primary determinants of DI procedure growth rates and toward a definition of appropriate use standards. A significant variation in areas considered homogeneous in terms of age, gender or mortality may indicate that use of radiological services is not optimal and underuse or overuse occurs.

This paper presents the results of a research project aiming at exploring the factors that explain the variability in waiting times and the use of computed tomography (CT) and magnetic resonance imaging (MRI) examination rates in Tuscany. The final purpose of the project is to support the regional administration planning process regarding resource allocation and to set standards and goals for local health authorities (LHAs).

## The Tuscan context and the research questions

The Italian National Health System is based on the principle of universal coverage and it is financed by general taxation. Following the decentralization process that started in the 90s, regions are responsible for organizing and providing healthcare services, while the national level has to ensure universal coverage for the whole population. 82% of healthcare expenditure is public (Source: OECD data 2009). The remaining 18% of private expenses for healthcare mainly concerns dental care and some other few specialist visits, copayment and drugs. Healthcare services can be provided

1  
2  
3 by both private and public institutions, their mix varies within Italian Regions. In Tuscany over  
4 90% of services are provided by public institutions.

5 In particular, CT and MRI exams are mainly covered by public expenditure and the few private  
6 providers of diagnostic imaging services work under contract with the public health authorities. The  
7 last Italian survey on citizens' behavior and consumptions, carried out on 2005 by the Italian  
8 National Institute of Statistics, demonstrated that more than 80% of diagnostic services are covered  
9 by public expenditure and copayment. The percentage of DI covered by out of pocket varies across  
10 Italian Regions. In Tuscany the percentage is about 16% (vs the Italian average of 20%), thus only a  
11 minor number of DI services is not registered into the regional administrative data<sup>8</sup>.

12 The Tuscan region reallocates resources among Local Health Authorities using the regional  
13 capitation formula. Hence, LHAs are responsible for the resource allocation process of all the  
14 healthcare services. To achieve this task, LHAs are in charge of organizing the supply structure and  
15 consequently they define the number of specialists and the equipment to be dedicated to diagnostic  
16 imaging.

17 The overall economic value of services such as computed tomography (CT) and magnetic  
18 resonance imaging (MRI) in Tuscany is around 65 million Euros (about 1% of the regional budget).  
19 The volume of these services for the 3.7 million of residents is one of the highest in Italy (Italian  
20 Ministry of Health [www.salute.gov.it](http://www.salute.gov.it)). Despite high volumes, the actual offerings in Tuscany seem  
21 to not be enough.

22 In 2010, waiting times in Tuscany were more than 60 days on average; however, for some LHAs,  
23 waiting times reached up to 90 days; variability appeared to be very great: waiting times went from  
24 14 to 260 days. Moreover, citizens claim that waiting times are quite long; this is the main reason  
25 why some of them choose the private supplier (see for instance the results of 2005 survey directed  
26 to population<sup>9</sup>).

27 Tuscan policy makers, therefore, consider waiting times to be one of the most important challenges  
28 to achieve, also because the National Government requested these diagnostic services to be  
29 delivered to patients within 30 days (Piano Nazionale di Governo delle Liste di Attesa –PNGLA-  
30 2010- 2012).

31 As regards the use rates per inhabitant standardized by age and sex, great variability (for MRI and  
32 CT) was registered in 2009 and 2010: CT use rates went from 45 to 88 per 1000 inhabitants, while  
33 the MRI use rates went from 56 to 83 per 1000 inhabitants.

34 The results indicate that, although Tuscany is a homogenous territory from a socio-demographic  
35 perspective and represents excellence within the Italian regions in terms of quality of healthcare and  
36 governance<sup>10</sup>, there is great variability across the region in terms of both waiting times and DI use  
37 rates.

38 Geographical variation in the DI use rates may constitute overuse or underuse with a consequent  
39 risk of inappropriateness of the service<sup>6</sup>. Bhargavan and Sunshine<sup>11</sup> highlighted great variability in  
40 the provision of DI services across areas and suggested that the use of appropriateness criteria, such  
41 as those defined by the ACR, may minimize these differences. Moreover, they explored this  
42 variability to highlight the state-level variables that affect it most, and they observed that the greater  
43 the number of Medicare providers, the greater the DI investigation rate per 1000 inhabitants.  
44 However, it is worth highlighting that the variability across regions could be affected by other  
45 factors like the availability of diagnostic technologies, socio-economic factors (i.e., education,  
46 income) or the number of radiologists in the region<sup>6,12</sup>. Moreover, Lysdahl and Børretzen<sup>6</sup> observed  
47 that each area may present a propensity toward a particular procedure considered a reasonable  
48 approach for a specific indication, which may lead each area to present a substitution effect among  
49 procedures types. On the contrary, it is found that the high use of one modality does not correspond  
50 with low use of an alternative modality for specific organs (locations), supporting the assumption  
51 that overuse really exists in high-use areas, thus leading to potentially inappropriate resource  
52 allocation.

53 In 2010 the Tuscan region evaluated as inappropriate district areas that registered use rates of the  
54  
55  
56  
57  
58  
59  
60

1  
2  
3 diagnostic imaging services far from the regional median use rate. Those districts may face the risk  
4 of an excessive number of radiation exposures (in the case that they are above the median) or a lack  
5 of services (in the case that they are lower than the median)<sup>13</sup>. This assumption yields some  
6 disadvantages because it does not take into account differences in medical procedures, where any  
7 decision involves a certain degree of discretion, the disease burden of particular areas, or patient  
8 preferences and outcomes<sup>14</sup>. However, Lysdahl and Børretzen<sup>6</sup> observed that the number of  
9 supplied DI services did not correspond to better health outcomes for inhabitants. Moreover, Song  
10 et al.<sup>7</sup> found that the mortality rate was not lower in areas presenting a high intensity of practices, as  
11 one could expect. Low-intensity and high-intensity areas present similar outcomes and, after three  
12 years, there is no evidence of a survival benefit among people who moved to higher intensity  
13 regions compared to those who moved to lower intensity regions.

14  
15 Considering these premises, the present research investigated the relationship between volumes and  
16 waiting times to find out if long waiting times are determined by high volumes of diagnostic  
17 services delivered to residents, as well as to assess the impact of factors such as the presence of  
18 private suppliers and providers. Some authors<sup>15 16</sup> suggest that, when coping with variation in  
19 healthcare, managers have to show, discuss and monitor data to question professional discretion.  
20 Hence, we analyzed the following issues:

21 RQ1: Does variability in the DI rate depend on the presence of private medical providers?

22 RQ2: Is there a substitution effect among diagnostic procedures or a problem of procedure mix?

23 RQ3: What is the relationship between the volumes delivered and the waiting times?

24  
25  
26 The most common strategy to reduce waiting times is to increase the supply throughout, on the one  
27 hand the enhancement of the production capacity (i.e. boosting the opening hours of scans to  
28 perform more examinations per scan and increase the number of examinations per radiologist), and  
29 on the other hand the increase in personnel /equipment or the contracting out<sup>17</sup>. Boosting the supply  
30 structure may increase the volumes (indeed, capacity is one of the factors that could explain the  
31 variability, as reported by scholars<sup>6 12 14 18</sup>).

32  
33  
34 RQ5: Does the number of radiologists and scans available for each LHA or the percentage of  
35 services contracted out affect volumes and waiting times?

36 RQ6: Which tool may support policy makers and managers to cope with demand and waiting  
37 times?

38  
39  
40 This paper presents some first evidence regarding the questions suggested and proposes a method to  
41 enhance the professional consciousness of specialists toward better resource allocation and  
42 performance management.

## 43 44 **Methods**

45 This study is based on empirical analyses. Data sources are both administrative data and surveys.  
46 Outpatient dataset includes all DI services provided to Tuscan inhabitants (in or out of the region  
47 and by public or private institutions) with the only exception of those exams full paid by patients.  
48 According to the last population survey conducted by the Italian National Institute of Statistics  
49 (Istat), in Tuscany the percentage of these exams should be around 16%.

50 To detect the first five research questions we run Pearson correlation and Anova analyses. In  
51 particular, we correlated the use rates and the percentage of examinations provided by private  
52 institutions for the RQ1, while we correlated the use rates of four couples of procedures for the  
53 RQ2. The four couples of potential substitute procedures were selected by radiologists and technical  
54 staff considering only the CT and MRI procedures and they are: the CT and MRI of the superior  
55 abdomen, the CT and MRI of the head and brain, the CT and MRI of the rachis and spine or the CT  
56 and MRI of the facial massive. We performed the one-way ANOVA to detect the variability across  
57 and within the CT(MRI) procedures' use-rates (RQ2). Further analyses for RQ2 were executed  
58  
59  
60



1  
2  
3 considering the twenty more frequent examinations of CT and MRI. This group approximately  
4 constitutes 90% of the total CT and MRI examinations performed in Tuscany in 2009. In addition to  
5 this analysis we provided a map of the number of examinations that exceed the regional median use  
6 rate per procedure across Tuscan LHAs in terms of financial value, following an approach similar to  
7 the one adopted by Nuti et al<sup>19</sup>.

8 For RQ4 we took into consideration: the number of radiologists and scans per inhabitants, the  
9 productivity scores of radiologists and the percentage of private services contracted out.

10 In particular, to calculate productivity indices two steps were followed.

11 The first step was to take into account the recommendations of the workload table developed by the  
12 Italian National Scientific Community of Radiologists published into an Italian report of 2006<sup>20</sup>. In  
13 this report radiologists, on the basis of their expertise and experience, argued that the time spent  
14 running examinations for young patients (less than 5 years old) is 25% (weight=1.25) greater than  
15 the time spent for patients between 5 and 79 years, while the time spent for elderly people (older  
16 than 79 years) is 15% (weight=1.15). Moreover, patients coming from the Emergency Department  
17 require the presence of radiologists and technicians for a longer period of time (estimated at 25%,  
18 weight=1.25), while inpatients require 15% (weight=1.15) of time more than outpatients. The  
19 corrected number of examinations was estimated using these weights. Other aspects presented in  
20 the workload report refer to some organizational issues, such as the changing room for patients or  
21 the presence of nurses, that can optimize the use of scans and personnel time. The research group  
22 considered these factors as part of the productivity that can be managed by LHAs, thus the only  
23 correction applied to efficiency indices refers to patient characteristics.

24 The second step regards the personnel. We conducted a survey collecting all personnel working in  
25 the DI departments. The personnel dedicated to CT (MRI) services was estimated using the  
26 workload table of the 2006 report<sup>a</sup> for the current DI examinations (both inpatients and outpatients)  
27 per health authority. This table reports the standard time radiologists spent to execute DI exams.  
28 The number of radiologists who deal only with CT (MRI) was estimated using the percentage of CT  
29 (MRI) exams (in terms of time) and the overall working time. The application of these weights and  
30 this deductive process of personnel identification were discussed with the research group, but also  
31 with the Italian National Scientific Community of Radiologists (SNR-SIRM) in 2011.

32 For the last research question, we followed the guidelines of an “interventionist research  
33 approach”. This approach aims to solve problems through the construction of models, diagrams,  
34 plans, organizations, etc., by means of the direct involvement of researchers and actors in  
35 “participant observations” in the field<sup>21</sup>. This method is used in a variety of fields: technical  
36 sciences, mathematics, operation analysis, clinical medicine and management control<sup>22</sup>.

37 Professionals were involved in detangling the DI variability and the management of waiting times.  
38 Radiologists, technical staff and management staff (such as the health and cost analysts) were  
39 involved in the research project.

40 Researchers facilitated the process, conducted the project while pointing out the questions and the  
41 research hypothesis, looked for articles that may support the perceived determinants of variability,  
42 collected data and ran statistical analyses to help professionals identify critical factors.

43 The calculations were based on the Tuscan outpatient dataset and on the Health Authority data for  
44 DI inpatients services, scans and personnel (collected by researchers via surveys).

## 50 Results

51  
52  
53  
54 <sup>a</sup> The table used is at page 12 of the report available on internet (only in Italian,  
55 [http://www.asppalermo.org/Archivio/circolari/dip\\_radiologia/metodo\\_nomencl\\_nuovo.pdf](http://www.asppalermo.org/Archivio/circolari/dip_radiologia/metodo_nomencl_nuovo.pdf) access September 2012)  
56 where there are 16 groups of examinations, each group has the time requested to the specialist for the execution in terms  
57 of minutes and in comparison with the time spent for the rx chest that is the reference exam of this table. For instance,  
58 the rx chest requires 7,1 minutes, while the CT without contrast requires 19,8 minutes (2.8 times longer than the time  
59 required for the rx chest)



1  
2  
3 The starting point of this research was the observation of the large variation in the use rates of  
4 outpatient CT and MRI procedures in Tuscany across the Local Health Authorities (LHAs), which  
5 is even more drastic across districts (Figure 1).  
6  
7

8 Figure 1 – CT and MRI use rates per 1000 inhabitants in the Tuscan districts.  
9  
10

11 Was this difference determined by the presence of private institutions?(RQ1) The correlation  
12 analysis between the use rates and the percentage of examinations provided by private institutions  
13 demonstrates that high use rates do not significantly depend on the private sector's activity: for MRI  
14 the correlation was  $r=-0.11$  with a  $p=0.727$  and for CT the correlation was  $r=0.072$  with a  
15  $p=0.823$ (see table 4). The fact that the presence of the private sector does not influence the  
16 variability confirms that it is not up to private providers to increase volumes, because their  
17 production is negotiated with the Tuscan LHAs which decide the percentage of services to be  
18 provided outside the public structure.  
19

20 Regarding RQ2, scholars suggest that variability could be due to substitution effects between  
21 different modalities. Low use rates of one modality in the examination of specific organs could  
22 generally correspond to high use rates of an alternative modality. However, data do not support this  
23 hypothesis; the correlation matrix between two possibly substitutable modalities of analysis  
24 indicates that there is no statistically significant correlation between them (Table 1). A significant  
25 negative correlation would have suggested that high rates of one modality correspond to low rates  
26 of the other, suggesting a likely substitution effect between them.  
27  
28

29 Table 1 – Substitution effect between four couples.  
30  
31

32 This result is comforting because there should be specific guidelines on the use of each diagnostic  
33 modality. The correlation matrix (table 1) also shows that there is positive and significant correlation  
34 between the use of some procedures, such as MRI backbone and superior abdomen, across the four  
35 groups. Similar results could be found in literature<sup>6</sup>.  
36

37 Variability across Health Authorities and their district areas could depend on the over (under) use of  
38 specific examinations. Indeed, the one-way Anova analysis highlights that there is more variability  
39 between procedures (around 90% for MRI and 71% for CT) than within them (see table 2).  
40  
41

42 Table 2- Analysis of variance of both CT and MRI use rates (groups are the procedures).  
43  
44

45 Hence, the overall variability is mainly due to a different mix of procedures applied by the districts.  
46 Looking at the standard deviation across districts for the use-rates of the 20 most recurring  
47 procedures, it emerged that procedures with the highest level of variability across local areas are:  
48 MRI musculoskeletal; MRI backbone; CT rachis and CT head (see table 3).  
49  
50

51 Table 3 – The list of use rate procedures with the highest standard deviation  
52

53 Appendix 1 for CT examinations and Appendix 2 for MRI examinations highlights the critical area  
54 of inappropriateness for each district, providing managers with the amount of leeway they could  
55 obtain if they performed at the regional median.  
56

57 For example, in the Apuane district, 90% of its leeway is concentrated on the musculoskeletal MRI,  
58 while there is no leeway for some other procedures (such as the Backbone MRI with contrast)  
59 because the use-rate is equal or lower than the regional median. At the regional level the resources  
60

1  
2  
3 that can be reallocated for MRI (around 5.5 million Euros ) are concentrated (57%) on the  
4 musculoskeletal and backbone examinations, while 42% of resources for CT (around 6 million  
5 Euros) are concentrated on the rachis and complete abdomen with contrast CT examinations.  
6 Once we found out some of the factors that could affect variability in terms of volumes, we looked  
7 at the relationship between volumes delivered and waiting times (RQ3). In both the CT and MRI  
8 matrix LHAs high use rates are not correlated with longer waiting times. Indeed, the Pearson  
9 correlation (table 4) reports a  $r=0.238$  and  $p=0.455$  for CT and a  $r=0.11$  and  $p=0.712$  for MRI.  
10  
11

12  
13 Table 4 The overall correlation matrix among volumes, efficiency, capacity, waiting times and  
14 recourse to private providers  
15  
16

17  
18 As for the RQ4, table 4 shows that for both CT and MRI examinations the percentage of services  
19 delivered by private institutions, the number of scans and radiologists and their efficiency are not  
20 correlated with waiting times. Instead, correlations among capacity factors and volumes are  
21 different for CT and MRI. In the case of MRI capacity, radiologists and scans per inhabitants and  
22 their efficiency are positively correlated with public use-rate. Moreover, the significant negative  
23 correlation between the percentage of services delivered by private institutions and the public use  
24 rates can be interpreted as a designed strategy of contracting out where private suppliers integrate  
25 public offerings.

26 Unlike MRI services and other studies on variability<sup>14 18</sup>, CT services in Tuscany seem not to be  
27 supply sensitive: the number of radiologists, technical staff per inhabitant, scans and the volumes  
28 per inhabitant provided by public providers appear not to influence the demand. It is worth to be  
29 noted that radiologists are employed by LHAs and volumes do not influence their salary.

30 As regards the strategy of increasing the capacity to reduce waiting times, this seems not to be  
31 effective. In particular, it is expected that the contracting out is a strategy applied by LHAs once  
32 their production capacity is saturated. Indeed, data show (table 4) that a higher percentage of  
33 services delivered by private providers corresponds to a lower radiologists productivity score ( $-0.8$   
34 for MRI and  $-0.7$  for CT both with a  $p<0.01$ ).

35 Thus, the recourse to private suppliers appears not to be cost-effective in Tuscany. LHAs with low  
36 productivity per radiologist could increase the number of examinations delivered by their public  
37 structures reducing the recourse to private providers. Hence, if all the radiologists working in public  
38 institutions had reached the maximum level of productivity, the reduction of examinations delivered  
39 by private institutions would have led to savings. Considering the actual number of scans at their  
40 maximum level of productivity and the fares of exams, these savings would have reached up to 10  
41 million Euros (6 million for CT and 5 million for MRI).

42 In conclusion, the overall Pearson correlation matrix (table 4) highlighted that waiting times do not  
43 correlate with the factors selected (volumes, capacity and efficiency). Similar results could be  
44 obtained performing the Anova analysis on waiting times and volumes, capacity and efficiency  
45 (Adjusted R square is 18%, residuals are greater than 50% and no factor has a  $p<0.05$ ).

46 The fact that there is no correlation between the scans/radiologists, volumes and waiting times  
47 could lead to the hypothesis that the management of waiting times cannot be generalized and will  
48 depend on factors that are strictly related to the local organizational decisions.

49 For the last research question (which tools are necessary to help managers coping with volumes and  
50 waiting times), the research team developed a two-dimensional matrix where the x-axis shows the  
51 use rate (the volumes per inhabitants) and the y axis reports the waiting times for CT or MRI.

52 Using regional medians, the matrix identifies four quadrants:

- 53 1. short waiting times and high volumes per inhabitant
  - 54 2. short waiting times and low volumes delivered
  - 55 3. long waiting times and high volumes per inhabitant
- 56  
57  
58  
59  
60

#### 4. long waiting times and low volumes delivered

This first classification yields the following hypothesis:

The institutions that belong to the first quadrant could risk delivering inappropriate services and/or have an excessive amount of resources at their disposal.

The institutions belonging to the second quadrant could risk substantially decreasing their supply of services or facing a problem in the quality of their services if their citizens decided to seek such services at other institutions.

The institutions that belong to the third quadrant could face problems in terms of appropriateness and production efficiency.

Finally, the institutions belonging to the fourth quadrant could face difficulties in terms of efficiency or inappropriate amount of resources.

Figure 2 the logical framework to cope with long waiting times and their relationship with volumes.

Figure 3 illustrates the matrix of both CT and MRI volumes and waiting times. Results and conclusion coming from the analysis of the matrix and correlation for CT and MRI are similar. The figure 3 shows that LHAs are positioned in all the four quadrants for both CT and MRI; this highlights that LHAs can face different problems. Using the above logical framework, some LHAs (e.g. 106 and 104 for CT or 102 and 107 for MRI) positioned in the third quadrant (high volumes and high waiting times) could face problems in terms of appropriateness and (low) efficiency. Those LHAs positioned in the fourth quadrant (low volume, high waiting times) may face problems relating to their capacity (few personnel, few scans) or (low) efficiency.

Figure 3 the matrix for waiting times and volumes of CT and MRI.

### Conclusions

This paper provides an analysis of the variability in the use rates of CT and MRI examinations in Tuscany. The analysis has been performed at the LHA level (including district areas) to support the decision-making process of local managers.

Results reveal a high level of variability among the LHAs' (and district areas ) use rates. Why do some residents use these DI services much more than others? Factors that may affect these results do not involve private providers or substitution effects between similar procedures (correlation analyses were not significant). The Anova analysis showed that 71% for CT and 90% for MRI of variability are explained between groups (procedures); indeed, the analysis of procedure mix indicates that there are some procedures (e.g. CTs of the head) with high level of standard deviations. Thus, the relevant issue is about how to share and increase the responsibility of GPs and specialists in the prescription phase.

The monetary value attached to the exams that exceed the median use rates suggests that there is a broad margin of intervention and the need for policy makers and managers to find new and more effective ways to control appropriateness.

This analysis of use rates is a fundamental step to cope with long waiting times, but it is not enough. Strategies adopted to cope with waiting times usually concern the enhancement of capacity throughout efficiency, the number of scans and radiologists per inhabitants and the contracting out.

This paper proposes a logical approach to identify the critical areas for controlling variability in use rates and to find out if waiting times are determined by inefficiencies, a lack of appropriateness in the prescription phase or a lack of professional resources. The final aim of the paper is to help decision makers define the priorities of intervention. Financial considerations were also added with the aim to both enhance the specialists' competence and the economic consciousness through

1  
2  
3 focus groups, and exploit the learning opportunities by comparing best practices.

4 The empirical analyses highlighted for both the CT and MRI examinations that waiting times in  
5 Tuscany are not affected by volumes or capacities. Moreover, unlike MRI and other studies on  
6 specialist care, it seems that the CT is not supply sensitive. Hence, the management of waiting  
7 times cannot be generalized and depends on other factors that are strictly related to the local  
8 organizational decisions. Moreover, this analysis highlighted that the Tuscan Region has to tackle  
9 with variation in volumes and high waiting times optimizing the productivity of personnel and  
10 scans; this t can lead to a reduction of costs (as a consequence of a reduction of contracting out).

11 The matrix supports in this paper helped policy makers and top managers analyze the complex task  
12 of coping with long waiting times and appropriateness.

13 Even if there are some limitations in generalizing the results described in this paper, since they  
14 could be affected by macro (e.g. public system based on universal coverage) and micro (e.g. the  
15 supply structure) factors linked to the Tuscan context, the matrix proposed can be applied outside  
16 this context. The matrix and its logical framework may represent a practical managerial tool that  
17 supports the difficult and multi factors analysis of waiting times and appropriateness in delivering  
18 outpatient services.  
19  
20  
21  
22  
23  
24  
25  
26  
27  
28  
29  
30  
31  
32  
33  
34  
35  
36  
37  
38  
39  
40  
41  
42  
43  
44  
45  
46  
47  
48  
49  
50  
51  
52  
53  
54  
55  
56  
57  
58  
59  
60

## Tables

Table 1 – Substitution effect between four couples.

| Couples | Investigations     | CT facial massive | MRI facial massive | MRI backbone | CT rachis | CT head     | MRI brain | CT sup. abdomen | MRI sup. abdomen |
|---------|--------------------|-------------------|--------------------|--------------|-----------|-------------|-----------|-----------------|------------------|
| 1       | CT facial massive  | 1.00              |                    |              |           |             |           |                 |                  |
| 1       | MRI facial massive | <b>-0.18</b>      | 1.00               |              |           |             |           |                 |                  |
| 2       | MRI backbone       | -0.11             | 0.69*              | 1.00         |           |             |           |                 |                  |
| 2       | CT rachis          | 0.13              | -0.11              | <b>-0.25</b> | 1.00      |             |           |                 |                  |
| 3       | CT head            | 0.44*             | -0.13              | -0.18        | 0.36*     | 1.00        |           |                 |                  |
| 3       | MRI brain          | -0.05             | 0.23               | 0.21         | 0.15      | <b>0.14</b> | 1.00      |                 |                  |
| 4       | CT sup. abdomen    | 0.43*             | 0.11               | 0.30         | 0.16      | 0.20        | 0.04      | 1.00            |                  |
| 4       | MRI sup. abdomen   | -0.18             | 0.56*              | 0.71*        | 0.09      | -0.21       | -0.07     | <b>0.31</b>     | 1.00             |

\* p&lt;0.01

Table 2- Analysis of variance of both CT and MRI use rates (groups are the procedures).

|     | Source                                                                    | SS             | %           | df         | MS              | F      | Prob > F |
|-----|---------------------------------------------------------------------------|----------------|-------------|------------|-----------------|--------|----------|
| MRI | Between groups                                                            | 0.030646       | 90%         | 31         | 0.000989        | 265.17 | 0        |
|     | Within groups                                                             | 0.003571       | 10%         | 958        | 3.73E-06        |        |          |
|     | <i>Total</i>                                                              | <i>0.03422</i> | <i>100%</i> | <i>989</i> | <i>3.5E-05</i>  |        |          |
| CT  | Between groups                                                            | 0.005658       | 71%         | 27         | 0.00021         | 74.94  | 0        |
|     | Within groups                                                             | 0.002324       | 29%         | 831        | 2.80E-06        |        |          |
|     | <i>Total</i>                                                              | <i>0.00798</i> | <i>100%</i> | <i>858</i> | <i>9.30E-06</i> |        |          |
| MRI | Bartlett's test for equal variances: chi2(31) = 4.1e+03 Prob>chi2 = 0.000 |                |             |            |                 |        |          |
| CT  | Bartlett's test for equal variances: chi2(27) = 1.5e+03 Prob>chi2 = 0.000 |                |             |            |                 |        |          |

Table 3 – The list of use rate procedures with the highest standard deviation

| Use rates of                       | Across districts standard deviations 2009 |
|------------------------------------|-------------------------------------------|
| MRI musculoskeletal                | 7.07                                      |
| MRI backbone                       | 6.95                                      |
| CT rachis                          | 5.02                                      |
| CT head                            | 3.6                                       |
| CT complete abdomen with contrast  | 2.92                                      |
| CT superior abdomen with contrast  | 2.55                                      |
| CT chest with contrast             | 2.1                                       |
| CT chest                           | 2.01                                      |
| CT lower extremity                 | 1.67                                      |
| RMI brain                          | 1.6                                       |
| RMI brain with contrast            | 1.56                                      |
| CT facial massive                  | 1.35                                      |
| CT head with contrast              | 0.91                                      |
| RMI backbone with contrast         | 0.72                                      |
| CT neck with contrast              | 0.63                                      |
| MRI facial massive with contrast   | 0.49                                      |
| MRI musculoskeletal with contrast  | 0.48                                      |
| Angio RMI                          | 0.43                                      |
| MRI superior abdomen with contrast | 0.36                                      |
| MRI facial massive                 | 0.34                                      |



Table 4 The overall correlation matrix among volumes, efficiency, capacity, waiting times and recourse to private providers

|            |                               | MRI              |                        |                  |                          |                             |                       |                                      | CT                |                          |                     |                  |                        |                  |                          |                             |                       |                                      |                   |                          |                     |
|------------|-------------------------------|------------------|------------------------|------------------|--------------------------|-----------------------------|-----------------------|--------------------------------------|-------------------|--------------------------|---------------------|------------------|------------------------|------------------|--------------------------|-----------------------------|-----------------------|--------------------------------------|-------------------|--------------------------|---------------------|
|            |                               | Scan efficiency  | Radiologist efficiency | Staff efficiency | Capacity per inhabitants | Radiologist per inhabitants | Staff per inhabitants | Private service delivered by private | Volumes Use rates | Volumes Public use rates | Times Waiting Times | Scan efficiency  | Radiologist efficiency | Staff efficiency | Capacity per inhabitants | Radiologist per inhabitants | Staff per inhabitants | Private service delivered by private | Volumes Use rates | Volumes Public use rates | Times Waiting Times |
| Efficiency | Scan efficiency               | 1                |                        |                  |                          |                             |                       |                                      |                   |                          |                     | 1                |                        |                  |                          |                             |                       |                                      |                   |                          |                     |
|            | Radiologist efficiency        | 0.0788<br>0.8078 | 1                      |                  |                          |                             |                       |                                      |                   |                          |                     | 0.2216<br>0.4888 | 1                      |                  |                          |                             |                       |                                      |                   |                          |                     |
|            | Staff efficiency              | 0.5275<br>0.078  | 0.8131<br>0.0013       | 1                |                          |                             |                       |                                      |                   |                          |                     | 0.4521<br>0.14   | 0.817<br>0.0012        | 1                |                          |                             |                       |                                      |                   |                          |                     |
| Capacity   | Scan per inhabitants          | 0.4495<br>0.1427 | 0.8416<br>0.0006       | 0.9104<br>0      | 1                        |                             |                       |                                      |                   |                          |                     | 0.6173<br>0.0325 | 0.4171<br>0.1773       | 0.3067<br>0.3322 | 1                        |                             |                       |                                      |                   |                          |                     |
|            | Radiologist per inhabitants   | 0.1887<br>0.557  | 0.4507<br>0.1414       | 0.3739<br>0.2312 | 0.596<br>0.0408          | 1                           |                       |                                      |                   |                          |                     | 0.0299<br>0.9265 | 0.8122<br>0.0013       | 0.4847<br>0.1103 | 0.1716<br>0.5939         | 1                           |                       |                                      |                   |                          |                     |
|            | Staff per inhabitants         | 0.6341<br>0.0268 | 0.4748<br>0.1189       | 0.02<br>0.9508   | 0.2942<br>0.3533         | 0.7496<br>0.005             | 1                     |                                      |                   |                          |                     | 0.3789<br>0.2246 | 0.6572<br>0.0202       | 0.8259<br>0.0009 | -0.057<br>0.8604         | 0.6346<br>0.0266            | 1                     |                                      |                   |                          |                     |
| Private    | %service delivered by private | 0.28<br>0.3781   | 0.8058<br>0.0016       | 0.8455<br>0.0005 | 0.9191<br>0              | -0.741<br>0.0058            | 0.4352<br>0.1573      | 1                                    |                   |                          |                     | 0.1636<br>0.6114 | 0.7513<br>0.0049       | 0.7322<br>0.0068 | 0.5105<br>0.0899         | 0.522<br>0.0817             | 0.6129<br>0.0341      | 1                                    |                   |                          |                     |
| Volumes    | Use rates                     | 0.5402<br>0.0698 | 0.5387<br>0.0707       | 0.2023<br>0.5283 | 0.1772<br>0.5816         | 0.192<br>0.55               | 0.4798<br>0.1144      | 0.1129<br>0.7268                     | 1                 |                          |                     | 0.0957<br>0.7674 | 0.4271<br>0.1662       | 0.2436<br>0.4456 | 0.2243<br>0.4834         | 0.4802<br>0.1141            | 0.1344<br>0.6772      | 0.0725<br>0.8228                     | 1                 |                          |                     |
|            | Public use rates              | 0.1335<br>0.6792 | 0.9033<br>0.0001       | 0.8429<br>0.0006 | 0.9149<br>0              | 0.7373<br>0.0062            | 0.5395<br>0.0702      | 0.9633<br>0                          | 0.3634<br>0.2457  | 1                        |                     | 0.263<br>0.4089  | 0.3699<br>0.2366       | 0.5014<br>0.0968 | 0.2821<br>0.3743         | 0.1249<br>0.6988            | 0.4652<br>0.1275      | 0.8201<br>0.0011                     | 0.4483<br>0.1439  | 1                        |                     |
| Waiting    | Waiting                       | -                | 0.1737                 | 0.188            | 0.2542                   | 0.0059                      | -                     | -                                    | 0.2384            | 0.1315                   | 1                   | -                | -                      | -                | -0.274                   | 0.0866                      | -                     | 0.4088                               | 0.1193            | -                        | 1                   |

1  
2  
3  
4  
5  
6  
7  
8  
9  
10  
11  
12  
13  
14  
15  
16  
17  
18  
19  
20  
21  
22  
23  
24  
25  
26  
27  
28  
29  
30  
31  
32  
33  
34  
35  
36  
37  
38  
39  
40  
41  
42  
43  
44  
45  
46  
47  
48  
49

|       |                     |               |               |               |               |               |               |               |               |               |  |  |               |               |               |               |              |               |               |              |               |
|-------|---------------------|---------------|---------------|---------------|---------------|---------------|---------------|---------------|---------------|---------------|--|--|---------------|---------------|---------------|---------------|--------------|---------------|---------------|--------------|---------------|
| times | Times               | 0.1195        |               |               |               |               | 0.0321        | 0.0568        |               |               |  |  | 0.0268        | 0.1965        | 0.1096        |               | 0.0078       |               | 0.3175        |              |               |
|       |                     | <i>0.7113</i> | <i>0.5892</i> | <i>0.5584</i> | <i>0.4253</i> | <i>0.9856</i> | <i>0.9211</i> | <i>0.8607</i> | <i>0.4556</i> | <i>0.6837</i> |  |  | <i>0.9341</i> | <i>0.5404</i> | <i>0.7346</i> | <i>0.3887</i> | <i>0.789</i> | <i>0.9809</i> | <i>0.1871</i> | <i>0.712</i> | <i>0.3145</i> |
|       | p values in italics |               |               |               |               |               |               |               |               |               |  |  |               |               |               |               |              |               |               |              |               |

For peer review only

### Acknowledgements

We thank Dr. Claudio Vignali (Director of the radiology department of the LHA 12 of Viareggio), Daniele Di Feo (responsible for the radiologist technical staff of Meyer teaching hospital) and all the LHAs' management for their worthy suggestions and collaboration. We also thank the participants of the "Wennberg International Collaborative Conference" held in London in September 2010. A particular acknowledgement to Prof. Gwyn Bevan and Prof. David C. Goodman for their comments on the earlier version of this paper.

For peer review only

## References

1. Guyatt GH, Tugwell PX, Feeny DH, Haynes RB, Drummond M. A framework for clinical evaluation of diagnostic technologies. *Canadian Medical Association Journal* 1986; 134:587-94.
2. Hendel RC. Utilization Management of Cardiovascular Imaging: Pre-certification and Appropriateness. *Journal of the American college of Cardiology: Cardiovascular Imaging* 2008;1:241-8.
3. Miller MM. MedPAC recommendations on imaging services. Medicare Payment Advisory Commission, 2005.
4. Blackmore CC. Defining Quality in Radiology. *The Journal of the American College of Radiology* 2007;4:217-23.
5. Smith-Bindman R, Miglioretti DL, Larson EB. Rising use of diagnostic medical imaging in a large integrated health system. *Health Affairs* 2008;27(6): 1491-1502
6. Lysdahl K.B. and Børretzen I. Geographical variation in radiological services: nationwide survey. *BMC Health Services Research*. 2007;7-21
7. Song Y, Skinner J, Bynum J, Sutherland J, Wennberg JE, Fisher ES. Regional Variation in Diagnostic Procedures. *The New England Journal Of Medicine*, 2010. 363(1): 45-53
8. Cislighi C, Giuliani F Out of pocket sanitario nelle regioni italiane *I quaderni di Monitor*, 2008;22:161-177.
9. Vainieri M. Che cosa influenza la soddisfazione dei cittadini toscani nei servizi territoriali di base? *Salute e Territorio* 2006;156: 137-156
10. Censis. I modelli decisionali nella sanità locale. Roma, 2008.
11. Bhargavan M, Sunshine JH. Utilization of radiology services in the United States: levels and trends in modalities, regions and populations. *Radiology* 2005; 234:824-832.
12. Lysdahl KB, Hofmann BM. What causes increasing and unnecessary use of radiological investigations? A survey of radiologists' perceptions. *BMC Health Services Research* 2009; 9:155
13. Nuti S, Barsanti S. *Il Sistema di valutazione della performance della sanità toscana - REPORT 2009 Società della Salute/Zone-Distretto*. Pisa: Edizioni ETS, 2010.
14. Wennberg EJ. *Tracking medicine*. Oxford: University Press, 2010.
15. Bevan G, Hollinghurst S, Benton P, Spark V, Sanderson H, Franklin D. Using information on variation in rates of supply to question professional discretion in public services. *Financial Accountability & Management* 2004; 20(1):1-17.
16. Lee TH. Turning doctors into leaders. *Harvard Business Review*. 2010; April:50-8.
17. Emery DJ, Forster A.J., Shojania KG, Magnan S. Management of MRI Wait Lists in Canada. *Healthcare Policy*. 2009; 4(3)
18. Appleby J, Raleigh V, Frosini F, Bevan G, Gao H, Lyscom T. *Variation in healthcare*. The King's Fund. 2011
19. Nuti S, Vainieri M, Bonini A. Disinvestment for re-allocation: A process to identify priorities in healthcare. *Health Policy* 2010; 95:137-43.
20. Sirm-Snr. Metodologia di determinazione dei volumi di attività e della produttività dei medici radiologi- Nomenclatore Sirm – Snr Delle Prestazioni Radiologiche. Genova: OMICRON, 2006.
21. Jonsson S, Lukka K. *Doing interventionist research in management accounting*. Goteborg: Gothenburg Research Institute, 2005.
22. Kasanen E, Lukka K, Siitonen A. The constructive approach in management accounting research. *J Manag Acc Res* 1993;5(Fall):243-64

1  
2  
3  
4  
5  
6  
7  
8  
9  
10  
11  
12  
13  
14  
15  
16  
17  
18  
19  
20  
21  
22  
23  
24  
25  
26  
27  
28  
29  
30  
31  
32  
33  
34  
35  
36  
37  
38  
39  
40  
41  
42  
43  
44  
45  
46  
47  
48  
49  
50  
51  
52  
53  
54  
55  
56  
57  
58  
59  
60



Review only

|                   |                                                                                            |                                                                                       |
|-------------------|--------------------------------------------------------------------------------------------|---------------------------------------------------------------------------------------|
| +<br>Waiting time | IV quadrant<br>• Problem of efficiency ?<br>• Problem of supply structure (insufficient) ? | III quadrant<br>• Problem of overuse?<br>• Problem of efficiency?                     |
|                   | II quadrant<br>• Problem of underuse ?                                                     | I quadrant<br>• Problem of overuse?<br>• Problem of supply structure (overstructured) |
| -                 | -                                                                                          |                                                                                       |
|                   | Volumes per inhabitants                                                                    |                                                                                       |
|                   |                                                                                            | +                                                                                     |

peer review only



1  
2  
3  
4  
5  
6  
7  
8  
9  
10  
11  
12  
13  
14  
15  
16  
17  
18  
19  
20  
21  
22  
23  
24  
25  
26  
27  
28  
29  
30  
31  
32  
33  
34  
35  
36  
37  
38  
39  
40  
41  
42  
43  
44  
45  
46  
47  
48  
49  
50  
51  
52  
53  
54  
55  
56  
57  
58  
59  
60

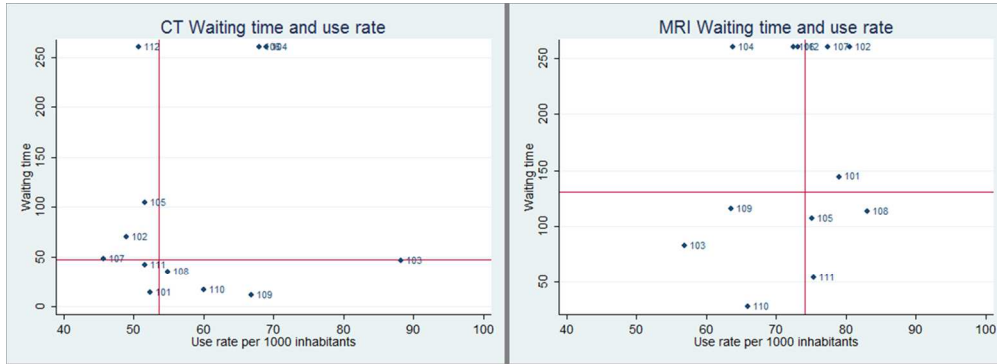



## Managing waiting times in diagnostic medical imaging

|                                                                                                                                                                |                                                                                                                                                                                                              |
|----------------------------------------------------------------------------------------------------------------------------------------------------------------|--------------------------------------------------------------------------------------------------------------------------------------------------------------------------------------------------------------|
| Journal:                                                                                                                                                       | <i>BMJ Open</i>                                                                                                                                                                                              |
| Manuscript ID:                                                                                                                                                 | bmjopen-2012-001255.R2                                                                                                                                                                                       |
| Article Type:                                                                                                                                                  | Research                                                                                                                                                                                                     |
| Date Submitted by the Author:                                                                                                                                  | 08-Nov-2012                                                                                                                                                                                                  |
| Complete List of Authors:                                                                                                                                      | Nuti, Sabina; Scuola Superiore Sant'Anna, Laboratorio Management e Sanità, Institute of Management<br>Vainieri, Milena; Scuola Superiore Sant'Anna, Laboratorio Management e Sanità, Institute of Management |
| <b>Primary Subject Heading</b>:                                                                                                                                | Health policy                                                                                                                                                                                                |
| Secondary Subject Heading:                                                                                                                                     | Health services research, Health economics, Radiology and imaging                                                                                                                                            |
| Keywords:                                                                                                                                                      | HEALTH SERVICES ADMINISTRATION & MANAGEMENT, Organisation of health services < HEALTH SERVICES ADMINISTRATION & MANAGEMENT, Health policy < HEALTH SERVICES ADMINISTRATION & MANAGEMENT                      |
| <p>Note: The following files were submitted by the author for peer review, but cannot be converted to PDF. You must view these files (e.g. movies) online.</p> |                                                                                                                                                                                                              |
| <p>appendix.mht</p>                                                                                                                                            |                                                                                                                                                                                                              |

SCHOLARONE™  
Manuscripts

only

1  
2  
3 **Title: Managing waiting times in diagnostic medical imaging.**  
4

5 Authors: Sabina Nuti and Milena Vainieri  
6

7 Institution: Laboratorio Management e Sanità , Institute of Management, Scuola Superiore  
8 Sant'Anna, Piazza Martiri della Libertà,24, 56127 Pisa, Italy.  
9

10 Corresponding author: Sabina Nuti

11 Postal address:Laboratorio Management e Sanità , Institute of Management, Scuola Superiore  
12 Sant'Anna, Piazza Martiri della Libertà,24, 56127 Pisa, Italy.

13 Email address: m.[vainieri@sssup.it](mailto:vainieri@sssup.it),

14 Phone number: +39050883996  
15  
16

17 Keywords: total quality management, diagnostic imaging, waiting list, organizational productivity,  
18 organizational decision making, health service administration.  
19

20 Word count (excluding title page, abstract, references, figures and tables) 4651  
21  
22  
23  
24  
25  
26  
27  
28  
29  
30  
31  
32  
33  
34  
35  
36  
37  
38  
39  
40  
41  
42  
43  
44  
45  
46  
47  
48  
49  
50  
51  
52  
53  
54  
55  
56  
57  
58  
59  
60

## Abstract

### Objective

This paper aims to analyze the variation in the delivery of diagnostic imaging services in order to suggest possible solutions for the reduction of waiting times, increase the quality of services and reduce financial costs.

### Design

This study provides a logic model to manage waiting times in a regional context. Waiting times measured per day were compared on the basis of the variability in the use rates of CT and MRI examinations in Tuscany for the population, as well as on the basis of the capacity offered with respect to the number of radiologists available. The analysis was performed at the local health authority level to support the decision-making process of local managers.

Setting: diagnostic imaging services, in particular the CT and MRI exams. The study involved all the 12 local health authorities that provide services for 3.7 million inhabitants of the Italian Tuscany Region.

Primary and secondary outcome measures:

Participants: The study uses regional administrative data on outpatients and survey data on inpatient diagnostic exams in order to measure productivity.

Primary and secondary outcome measures: The study uses the volumes per 1000 inhabitants, the days of waiting times and the number of exams per radiologist. Variability was measured using the traditional standard deviation measures.

### Results

A significant variation in areas considered homogeneous in terms of age, gender or mortality may indicate that the use of radiological services is not optimal and underuse or overuse occurs and that there is room for improvement in the service organization.

### Conclusions

Considering that there is a high level of variability among district use rates and waiting times, this study provides managers with a specific tool to find the cause of the problem, identify a possible solution, assess the financial impact and initiate the eventual reduction of waste.

## Article summary

Article focus: Which factors explain the variability in waiting times and in the use of computed tomography (CT) and magnetic resonance imaging (MRI) examination rates? This article aims to analyze the relationships among radiologists' productivity, use rates and waiting times in the Tuscan Region. Moreover, it proposes a logical tool to help managers deal with this complex issue.

Key messages: The results reveal a high level of variability among the DI use rates of LHAs. The factors that may affect these results do not involve private providers or substitution effects between similar procedures. Monitoring the appropriateness phase of the prescription becomes critical when it is difficult to ensure acceptable waiting times which could be due to high volumes of the diagnostic imaging services delivered or may depend on inefficiency or a lack of professional resources (e.g. the number of radiologists). In Tuscany there is no correlation among scans/radiologists, volumes and waiting times. This could lead to the hypothesis that the management of waiting times cannot be generalized and depends on other factors that are strictly related to the local organizational decisions. Finally, the paper proposes a logical framework to help policy makers and managers cope with waiting times and appropriateness.

Strengths and limitations: This study analyzes the variation on diagnostic imaging services throughout different perspectives (volumes, waiting times and productivity). It provides policy makers with a logical model to manage this variation. Limitations regard the generalization of results, as part of them may be referred only to the organizational features of the region analyzed (as for the productivity).

## Background

The epidemiological changes of the last 30 years have caused a reduction in acute care for populations and an exponential growth in the number of outpatient and diagnostic services. Moreover, technological innovations in the diagnostic sector have made services more efficient, but at the same time more expensive, thus increasing costs.

Citizens and physicians increasingly request diagnostic services, often without considering their possible negative effects, such as radiation caused by CT examinations. It appears that the offer of diagnostic services does not cover the demand from patients, thus causing waiting lists to be increasingly longer and patients to be highly unsatisfied.

Policy makers must therefore face a complex situation resulting from longer waiting times, the increasing demand of diagnostic services from patients and increasing costs.

Which mechanisms may be adopted in order to face such situations and assist managers of public health systems to identify the causes of the problem and possible solutions?

On one hand, the regional health system, with a universal coverage mission, should provide an adequate number of DI services to grant equity of access to all citizens and should deliver such services in a timely fashion and according to patients' needs. On the other hand, it should reduce the patients' radiation exposure and the inappropriate duplication of exams as much as possible.

The World Health Organization (WHO) argues that the use rates of DI services should be adapted to the local needs and should be determined by (i) the type and size of the hospital; (ii) the number and type of patients: disease burden, inpatients and outpatients; and (iii) the therapeutic capabilities. Guyatt et al.<sup>1</sup> underlined the importance of accounting for the reassuring effect of an investigation on the wellness of a worried patient, while Hendel<sup>2</sup> suggested that intangible factors, local practice and clinical judgment must be carefully considered in the DI procedure appropriateness assessment.

Certainly, the huge growth of DI procedures observed in the last years raises concern about a possible overuse of these services<sup>2 3 4 5</sup>. According to the European referral guidelines for imaging, the causes of DI service overuse are multiple: repeated investigations, investigations performed although unlikely to affect patient management and premature or incorrect investigations.

Miller<sup>3</sup> (2005) and Lysdahl and Børretzen<sup>6</sup> observed that the number of supplied DI services is very different among geographical areas and that, often, geographical areas that supply a larger number of DI services do not present better health outcomes for the inhabitants. Song et al.<sup>7</sup> reported that there was no evidence of a survival benefit among people who moved to regions with a higher intensity level of procedures compared to those who moved to lower-intensity regions.

These results suggest that the analysis of the DI services variability across geographical regions could be an important step toward the understanding of the primary determinants of DI procedure growth rates and toward a definition of appropriate use standards. A significant variation in areas considered homogeneous in terms of age, gender or mortality may indicate that use of radiological services is not optimal and underuse or overuse occurs.

This paper presents the results of a research project aiming at exploring the factors that explain the variability in waiting times and the use of computed tomography (CT) and magnetic resonance imaging (MRI) examination rates in Tuscany. The final purpose of the project is to support the regional administration planning process regarding resource allocation and to set standards and goals for local health authorities (LHAs).

## The Tuscan context and the research questions

The Italian National Health System is based on the principle of universal coverage and it is financed by general taxation. Following the decentralization process that started in the 90s, regions are responsible for organizing and providing healthcare services, while the national level has to ensure universal coverage for the whole population. 82% of healthcare expenditure is public (Source: OECD data 2009). The remaining 18% of private expenses for healthcare mainly concerns dental care and some other few specialist visits, copayment and drugs. Healthcare services can be provided

1  
2  
3 by both private and public institutions, their mix varies within Italian Regions. In Tuscany over  
4 90% of services are provided by public institutions.

5 In particular, CT and MRI exams are mainly covered by public expenditure and the few private  
6 providers of diagnostic imaging services work under contract with the public health authorities. The  
7 last Italian survey on citizens' behavior and consumptions, carried out on 2005 by the Italian  
8 National Institute of Statistics, demonstrated that more than 80% of diagnostic services are covered  
9 by public expenditure and copayment. The percentage of DI covered by out of pocket varies across  
10 Italian Regions. In Tuscany the percentage is about 16% (vs the Italian average of 20%), thus only a  
11 minor number of DI services is not registered into the regional administrative data<sup>8</sup>.

12 The Tuscan region reallocates resources among Local Health Authorities using the regional  
13 capitation formula. Hence, LHAs are responsible for the resource allocation process of all the  
14 healthcare services. To achieve this task, LHAs are in charge of organizing the supply structure and  
15 consequently they define the number of specialists and the equipment to be dedicated to diagnostic  
16 imaging.

17 The overall economic value of services such as computed tomography (CT) and magnetic  
18 resonance imaging (MRI) in Tuscany is around 65 million Euros (about 1% of the regional budget).  
19 The volume of these services for the 3.7 million of residents is one of the highest in Italy (Italian  
20 Ministry of Health [www.salute.gov.it](http://www.salute.gov.it)). Despite high volumes, the actual offerings in Tuscany seem  
21 to not be enough.

22 In 2010, waiting times in Tuscany were more than 60 days on average; however, for some LHAs,  
23 waiting times reached up to 90 days; variability appeared to be very great: waiting times went from  
24 14 to 260 days. Moreover, citizens claim that waiting times are quite long; this is the main reason  
25 why some of them choose the private supplier (see for instance the results of 2005 survey directed  
26 to population<sup>9</sup>).

27 Tuscan policy makers, therefore, consider waiting times to be one of the most important challenges  
28 to achieve, also because the National Government requested these diagnostic services to be  
29 delivered to patients within 30 days (Piano Nazionale di Governo delle Liste di Attesa –PNGLA-  
30 2010- 2012).

31 As regards the use rates per inhabitant standardized by age and sex, great variability (for MRI and  
32 CT) was registered in 2009 and 2010: CT use rates went from 45 to 88 per 1000 inhabitants, while  
33 the MRI use rates went from 56 to 83 per 1000 inhabitants.

34 The results indicate that, although Tuscany is a homogenous territory from a socio-demographic  
35 perspective and represents excellence within the Italian regions in terms of quality of healthcare and  
36 governance<sup>10</sup>, there is great variability across the region in terms of both waiting times and DI use  
37 rates.

38 Geographical variation in the DI use rates may constitute overuse or underuse with a consequent  
39 risk of inappropriateness of the service<sup>6</sup>. Bhargavan and Sunshine<sup>11</sup> highlighted great variability in  
40 the provision of DI services across areas and suggested that the use of appropriateness criteria, such  
41 as those defined by the ACR, may minimize these differences. Moreover, they explored this  
42 variability to highlight the state-level variables that affect it most, and they observed that the greater  
43 the number of Medicare providers, the greater the DI investigation rate per 1000 inhabitants.  
44 However, it is worth highlighting that the variability across regions could be affected by other  
45 factors like the availability of diagnostic technologies, socio-economic factors (i.e., education,  
46 income) or the number of radiologists in the region<sup>6,12</sup>. Moreover, Lysdahl and Børretzen<sup>6</sup> observed  
47 that each area may present a propensity toward a particular procedure considered a reasonable  
48 approach for a specific indication, which may lead each area to present a substitution effect among  
49 procedures types. On the contrary, it is found that the high use of one modality does not correspond  
50 with low use of an alternative modality for specific organs (locations), supporting the assumption  
51 that overuse really exists in high-use areas, thus leading to potentially inappropriate resource  
52 allocation.

53 In 2010 the Tuscan region evaluated as inappropriate district areas that registered use rates of the  
54  
55  
56  
57  
58  
59  
60



1  
2  
3 diagnostic imaging services far from the regional median use rate. Those districts may face the risk  
4 of an excessive number of radiation exposures (in the case that they are above the median) or a lack  
5 of services (in the case that they are lower than the median)<sup>13</sup>. This assumption yields some  
6 disadvantages because it does not take into account differences in medical procedures, where any  
7 decision involves a certain degree of discretion, the disease burden of particular areas, or patient  
8 preferences and outcomes<sup>14</sup>. However, Lysdahl and Børretzen<sup>6</sup> observed that the number of  
9 supplied DI services did not correspond to better health outcomes for inhabitants. Moreover, Song  
10 et al.<sup>7</sup> found that the mortality rate was not lower in areas presenting a high intensity of practices, as  
11 one could expect. Low-intensity and high-intensity areas present similar outcomes and, after three  
12 years, there is no evidence of a survival benefit among people who moved to higher intensity  
13 regions compared to those who moved to lower intensity regions.

14  
15 Considering these premises, the present research investigated the relationship between volumes and  
16 waiting times to find out if long waiting times are determined by high volumes of diagnostic  
17 services delivered to residents, as well as to assess the impact of factors such as the presence of  
18 private suppliers and providers. Some authors<sup>15 16</sup> suggest that, when coping with variation in  
19 healthcare, managers have to show, discuss and monitor data to question professional discretion.  
20 Hence, we analyzed the following issues:

21 RQ1: Does variability in the DI rate depend on the presence of private medical providers?

22 RQ2: Is there a substitution effect among diagnostic procedures or a problem of procedure mix?

23 RQ3: What is the relationship between the volumes delivered and the waiting times?

24  
25  
26 The most common strategy to reduce waiting times is to increase the supply throughout, on the one  
27 hand the enhancement of the production capacity (i.e. boosting the opening hours of scans to  
28 perform more examinations per scan and increase the number of examinations per radiologist), and  
29 on the other hand the increase in personnel /equipment or the contracting out<sup>17</sup>. Boosting the supply  
30 structure may increase the volumes (indeed, capacity is one of the factors that could explain the  
31 variability, as reported by scholars<sup>6 12 14 18</sup>).

32  
33  
34 RQ5: Does the number of radiologists and scans available for each LHA or the percentage of  
35 services contracted out affect volumes and waiting times?

36 RQ6: Which tool may support policy makers and managers to cope with demand and waiting  
37 times?

38  
39  
40 This paper presents some first evidence regarding the questions suggested and proposes a method to  
41 enhance the professional consciousness of specialists toward better resource allocation and  
42 performance management.

## 43 **Methods**

44  
45 This study is based on empirical analyses. Data sources are both administrative data and surveys.  
46 Outpatient dataset includes all DI services provided to Tuscan inhabitants (in or out of the region  
47 and by public or private institutions) with the only exception of those exams full paid by patients.  
48 According to the last population survey conducted by the Italian National Institute of Statistics  
49 (Istat), in Tuscany the percentage of these exams should be around 16%.

50 To detect the first five research questions we run Pearson correlation and Anova analyses. In  
51 particular, we correlated the use rates and the percentage of examinations provided by private  
52 institutions for the RQ1, while we correlated the use rates of four couples of procedures for the  
53 RQ2. The four couples of potential substitute procedures were selected by radiologists and technical  
54 staff considering only the CT and MRI procedures and they are: the CT and MRI of the superior  
55 abdomen, the CT and MRI of the head and brain, the CT and MRI of the rachis and spine or the CT  
56 and MRI of the facial massive. We performed the one-way ANOVA to detect the variability across  
57 and within the CT(MRI) procedures' use-rates (RQ2). Further analyses for RQ2 were executed  
58  
59  
60

1  
2  
3 considering the twenty more frequent examinations of CT and MRI. This group approximately  
4 constitutes 90% of the total CT and MRI examinations performed in Tuscany in 2009. In addition to  
5 this analysis we provided a map of the number of examinations that exceed the regional median use  
6 rate per procedure across Tuscan LHAs in terms of financial value, following an approach similar to  
7 the one adopted by Nuti et al<sup>19</sup>.

8 For RQ4 we took into consideration: the number of radiologists and scans per inhabitants, the  
9 productivity scores of radiologists and the percentage of private services contracted out.

10 In particular, to calculate productivity indices two steps were followed.

11 The first step was to take into account the recommendations of the workload table developed by the  
12 Italian National Scientific Community of Radiologists published into an Italian report of 2006<sup>20</sup>. In  
13 this report radiologists, on the basis of their expertise and experience, argued that the time spent  
14 running examinations for young patients (less than 5 years old) is 25% (weight=1.25) greater than  
15 the time spent for patients between 5 and 79 years, while the time spent for elderly people (older  
16 than 79 years) is 15% (weight=1.15). Moreover, patients coming from the Emergency Department  
17 require the presence of radiologists and technicians for a longer period of time (estimated at 25%,  
18 weight=1.25), while inpatients require 15% (weight=1.15) of time more than outpatients. The  
19 corrected number of examinations was estimated using these weights. Other aspects presented in  
20 the workload report refer to some organizational issues, such as the changing room for patients or  
21 the presence of nurses, that can optimize the use of scans and personnel time. The research group  
22 considered these factors as part of the productivity that can be managed by LHAs, thus the only  
23 correction applied to efficiency indices refers to patient characteristics.

24 The second step regards the personnel. We conducted a survey collecting all personnel working in  
25 the DI departments. The personnel dedicated to CT (MRI) services was estimated using the  
26 workload table of the 2006 report<sup>a</sup> for the current DI examinations (both inpatients and outpatients)  
27 per health authority. This table reports the standard time radiologists spent to execute DI exams.  
28 The number of radiologists who deal only with CT (MRI) was estimated using the percentage of CT  
29 (MRI) exams (in terms of time) and the overall working time. The application of these weights and  
30 this deductive process of personnel identification were discussed with the research group, but also  
31 with the Italian National Scientific Community of Radiologists (SNR-SIRM) in 2011.

32 For the last research question, we followed the guidelines of an “interventionist research  
33 approach”. This approach aims to solve problems through the construction of models, diagrams,  
34 plans, organizations, etc., by means of the direct involvement of researchers and actors in  
35 “participant observations” in the field<sup>21</sup>. This method is used in a variety of fields: technical  
36 sciences, mathematics, operation analysis, clinical medicine and management control<sup>22</sup>.

37 Professionals were involved in detangling the DI variability and the management of waiting times.  
38 Radiologists, technical staff and management staff (such as the health and cost analysts) were  
39 involved in the research project.

40 Researchers facilitated the process, conducted the project while pointing out the questions and the  
41 research hypothesis, looked for articles that may support the perceived determinants of variability,  
42 collected data and ran statistical analyses to help professionals identify critical factors.

43 The calculations were based on the Tuscan outpatient dataset and on the Health Authority data for  
44 DI inpatients services, scans and personnel (collected by researchers via surveys).

## 50 Results

51  
52  
53  
54 <sup>a</sup> The table used is at page 12 of the report available on internet (only in Italian,  
55 [http://www.asppalermo.org/Archivio/circolari/dip\\_radiologia/metodo\\_nomencl\\_nuovo.pdf](http://www.asppalermo.org/Archivio/circolari/dip_radiologia/metodo_nomencl_nuovo.pdf) access September 2012). In  
56 this report there are 16 groups of examinations, each group has the time requested to the specialist for the execution in  
57 terms of minutes and in comparison with the time spent for the rx chest that is the reference exam of this table. For  
58 instance, the rx chest requires 7,1 minutes, while the CT without contrast requires 19,8 minutes (2.8 times longer than  
59 the time required for the rx chest)

1  
2  
3 The starting point of this research was the observation of the large variation in the use rates of  
4 outpatient CT and MRI procedures in Tuscany across the Local Health Authorities (LHAs), which  
5 is even more drastic across districts. Figure 1 reports the appraisal made by the Tuscan Health  
6 System on the CT and MRI use rates in 2009. The colors identify the evaluation on the basis of the  
7 distance from the median use rate: better results are positioned closer to the median rate while worst  
8 results are positioned farther from the median because of the increasing risk of over/under use. The  
9 appraisal is organized into five colored bands: very good (dark green); good (green); medium  
10 (yellow); bad (orange) and very bad (red) performance.  
11

12  
13  
14 Figure 1 – CT and MRI use rates per 1000 inhabitants in the Tuscan districts.  
15

16  
17 Was this difference determined by the presence of private institutions?(RQ1) The correlation  
18 analysis between the use rates and the percentage of examinations provided by private institutions  
19 demonstrates that high use rates do not significantly depend on the private sector's activity: for MRI  
20 the correlation was  $r=-0.11$  with a  $p=0.727$  and for CT the correlation was  $r=0.072$  with a  
21  $p=0.823$ (see table 4). The fact that the presence of the private sector does not influence the  
22 variability confirms that it is not up to private providers to increase volumes, because their  
23 production is negotiated with the Tuscan LHAs which decide the percentage of services to be  
24 provided outside the public structure.  
25

26 Regarding RQ2, scholars suggest that variability could be due to substitution effects between  
27 different modalities. Low use rates of one modality in the examination of specific organs could  
28 generally correspond to high use rates of an alternative modality. However, data do not support this  
29 hypothesis; the correlation matrix between two possibly substitutable modalities of analysis  
30 indicates that there is no statistically significant correlation between them (Table 1). A significant  
31 negative correlation would have suggested that high rates of one modality correspond to low rates  
32 of the other, suggesting a likely substitution effect between them.  
33

34  
35 Table 1 – Substitution effect between four couples.  
36

37  
38 This result is comforting because there should be specific guidelines on the use of each diagnostic  
39 modality. The correlation matrix (table1) also shows that there is positive and significant correlation  
40 between the use of some procedures, such as MRI backbone and superior abdomen, across the four  
41 groups. Similar results could be found in literature<sup>6</sup>.  
42

43 Variability across Health Authorities and their district areas could depend on the over (under) use of  
44 specific examinations. Indeed, the one-way Anova analysis highlights that there is more variability  
45 between procedures (around 90% for MRI and 71% for CT) than within them (see table 2).  
46

47 Table 2- Analysis of variance of both CT and MRI use rates (groups are the procedures).  
48

49  
50 Hence, the overall variability is mainly due to a different mix of procedures applied by the districts.  
51 Looking at the standard deviation across districts for the use-rates of the 20 most recurring  
52 procedures, it emerged that procedures with the highest level of variability across local areas are:  
53 MRI musculoskeletal; MRI backbone; CT rachis and CT head (see table 3).  
54

55  
56 Table 3 – The list of use rate procedures with the highest standard deviation  
57

58 Appendix 1 for CT examinations and Appendix 2 for MRI examinations highlights the critical area  
59  
60

1  
2  
3 of inappropriateness for each district, providing managers with the amount of leeway they could  
4 obtain if they performed at the regional median.

5 For example, in the Apuane district, 90% of its leeway is concentrated on the musculoskeletal MRI,  
6 while there is no leeway for some other procedures (such as the Backbone MRI with contrast)  
7 because the use-rate is equal or lower than the regional median. At the regional level the resources  
8 that can be reallocated for MRI (around 5.5 million Euros ) are concentrated (57%) on the  
9 musculoskeletal and backbone examinations, while 42% of resources for CT (around 6 million  
10 Euros) are concentrated on the rachis and complete abdomen with contrast CT examinations.

11 Once we found out some of the factors that could affect variability in terms of volumes, we looked  
12 at the relationship between volumes delivered and waiting times (RQ3). In both the CT and MRI  
13 matrix LHAs high use rates are not correlated with longer waiting times. Indeed, the Pearson  
14 correlation (table 4) reports a  $r=0.238$  and  $p=0.455$  for CT and a  $r=0.11$  and  $p=0.712$  for MRI.  
15  
16

17  
18 Table 4 The overall correlation matrix among volumes, efficiency, capacity, waiting times and  
19 recourse to private providers  
20  
21

22  
23 As for the RQ4, table 4 shows that for both CT and MRI examinations the percentage of services  
24 delivered by private institutions, the number of scans and radiologists and their efficiency are not  
25 correlated with waiting times. Instead, correlations among capacity factors and volumes are  
26 different for CT and MRI. In the case of MRI capacity, radiologists and scans per inhabitants and  
27 their efficiency are positively correlated with public use-rate. Moreover, the significant negative  
28 correlation between the percentage of services delivered by private institutions and the public use  
29 rates can be interpreted as a designed strategy of contracting out where private suppliers integrate  
30 public offerings.  
31

32 Unlike MRI services and other studies on variability<sup>14 18</sup>, CT services in Tuscany seem not to be  
33 supply sensitive: the number of radiologists, technical staff per inhabitant, scans and the volumes  
34 per inhabitant provided by public providers appear not to influence the demand. It is worth to be  
35 noted that radiologists are employed by LHAs and volumes do not influence their salary.

36 As regards the strategy of increasing the capacity to reduce waiting times, this seems not to be  
37 effective. In particular, it is expected that the contracting out is a strategy applied by LHAs once  
38 their production capacity is saturated. Indeed, data show (table 4) that a higher percentage of  
39 services delivered by private providers corresponds to a lower radiologists productivity score (-0.8  
40 for MRI and -0.7 for CT both with a  $p<0.01$ ).  
41

42 Thus, the recourse to private suppliers appears not to be cost-effective in Tuscany. LHAs with low  
43 productivity per radiologist could increase the number of examinations delivered by their public  
44 structures reducing the recourse to private providers. Hence, if all the radiologists working in public  
45 institutions had reached the maximum level of productivity, the reduction of examinations delivered  
46 by private institutions would have led to savings. Considering the actual number of scans at their  
47 maximum level of productivity and the fares of exams, these savings would have reached up to 10  
48 million Euros (6 million for CT and 5 million for MRI).  
49

50 In conclusion, the overall Pearson correlation matrix (table 4) highlighted that waiting times do not  
51 correlate with the factors selected (volumes, capacity and efficiency). Similar results could be  
52 obtained performing the Anova analysis on waiting times and volumes, capacity and efficiency  
53 (Adjusted R square is 18%, residuals are greater than 50% and no factor has a  $p<0.05$ ).  
54

55 The fact that there is no correlation between the scans/radiologists, volumes and waiting times  
56 could lead to the hypothesis that the management of waiting times cannot be generalized and will  
57 depend on factors that are strictly related to the local organizational decisions.

58 For the last research question (which tools are necessary to help managers coping with volumes and  
59 waiting times), the research team developed a two-dimensional matrix where the x-axis shows the  
60

1  
2  
3 use rate (the volumes per inhabitants) and the y axis reports the waiting times for CT or MRI.  
4 Using regional medians, the matrix identifies four quadrants:

- 5 1. short waiting times and high volumes per inhabitant
  - 6 2. short waiting times and low volumes delivered
  - 7 3. long waiting times and high volumes per inhabitant
  - 8 4. long waiting times and low volumes delivered
- 9

10 This first classification yields the following hypothesis:

11 The institutions that belong to the first quadrant could risk delivering inappropriate services and/or  
12 have an excessive amount of resources at their disposal.

13 The institutions belonging to the second quadrant could risk substantially decreasing their supply of  
14 services or facing a problem in the quality of their services if their citizens decided to seek such  
15 services at other institutions.

16 The institutions that belong to the third quadrant could face problems in terms of appropriateness  
17 and production efficiency.

18 Finally, the institutions belonging to the fourth quadrant could face difficulties in terms of efficiency  
19 or inappropriate amount of resources.

20  
21  
22

23 Figure 2 the logical framework to cope with long waiting times and their relationship with volumes.  
24  
25

26 Figure 3 illustrates the matrix of both CT and MRI volumes and waiting times. Results and  
27 conclusion coming from the analysis of the matrix and correlation for CT and MRI are similar. The  
28 figure 3 shows that LHAs are positioned in all the four quadrants for both CT and MRI; this  
29 highlights that LHAs can face different problems. Using the above logical framework, some LHAs  
30 (e.g. 106 and 104 for CT or 102 and 107 for MRI) positioned in the third quadrant (high volumes  
31 and high waiting times) could face problems in terms of appropriateness and (low) efficiency.  
32 Those LHAs positioned in the fourth quadrant (low volume, high waiting times) may face problems  
33 relating to their capacity (few personnel, few scans) or (low) efficiency.

34  
35

36 Figure 3 the matrix for waiting times and volumes of CT and MRI.  
37  
38  
39

## 40 **Conclusions**

41 This paper provides an analysis of the variability in the use rates of CT and MRI examinations in  
42 Tuscany. The analysis has been performed at the LHA level (including district areas) to support the  
43 decision-making process of local managers.

44 Results reveal a high level of variability among the LHAs' (and district areas ) use rates. Why do  
45 some residents use these DI services much more than others? Factors that may affect these results  
46 do not involve private providers or substitution effects between similar procedures (correlation  
47 analyses were not significant). The Anova analysis showed that 71% for CT and 90% for MRI of  
48 variability are explained between groups (procedures); indeed, the analysis of procedure mix  
49 indicates that there are some procedures (e.g. CTs of the head) with high level of standard  
50 deviations. Thus, the relevant issue is about how to share and increase the responsibility of GPs and  
51 specialists in the prescription phase.

52 The monetary value attached to the exams that exceed the median use rates suggests that there is a  
53 broad margin of intervention and the need for policy makers and managers to find new and more  
54 effective ways to control appropriateness.

55 This analysis of use rates is a fundamental step to cope with long waiting times, but it is not enough.  
56 Strategies adopted to cope with waiting times usually concern the enhancement of capacity  
57 throughout efficiency, the number of scans and radiologists per inhabitants and the contracting out.  
58  
59  
60



1  
2  
3 This paper proposes a logical approach to identify the critical areas for controlling variability in use  
4 rates and to find out if waiting times are determined by inefficiencies, a lack of appropriateness in  
5 the prescription phase or a lack of professional resources. The final aim of the paper is to help  
6 decision makers define the priorities of intervention. Financial considerations were also added with  
7 the aim to both enhance the specialists' competence and the economic consciousness through  
8 focus groups, and exploit the learning opportunities by comparing best practices.

9  
10 The empirical analyses highlighted for both the CT and MRI examinations that waiting times in  
11 Tuscany are not affected by volumes or capacities. Moreover, unlike MRI and other studies on  
12 specialist care, it seems that the CT is not supply sensitive. Hence, the management of waiting  
13 times cannot be generalized and depends on other factors that are strictly related to the local  
14 organizational decisions. Moreover, this analysis highlighted that the Tuscan Region has to tackle  
15 with variation in volumes and high waiting times optimizing the productivity of personnel and  
16 scans; this can lead to a reduction of costs (as a consequence of a reduction of contracting out).

17 The matrix supports in this paper helped policy makers and top managers analyze the complex task  
18 of coping with long waiting times and appropriateness.

19  
20 Even if there are some limitations in generalizing the results described in this paper, since they  
21 could be affected by macro (e.g. public system based on universal coverage) and micro (e.g. the  
22 supply structure) factors linked to the Tuscan context, the matrix proposed can be applied outside  
23 this context. The matrix and its logical framework may represent a practical managerial tool that  
24 supports the difficult and multi factors analysis of waiting times and appropriateness in delivering  
25 outpatient services.  
26  
27  
28  
29  
30  
31  
32  
33  
34  
35  
36  
37  
38  
39  
40  
41  
42  
43  
44  
45  
46  
47  
48  
49  
50  
51  
52  
53  
54  
55  
56  
57  
58  
59  
60



## Tables

Table 1 – Substitution effect between four couples.

| Couples | Investigations     | CT facial massive | MRI facial massive | MRI backbone | CT rachis | CT head     | MRI brain | CT sup. abdomen | MRI sup. abdomen |
|---------|--------------------|-------------------|--------------------|--------------|-----------|-------------|-----------|-----------------|------------------|
| 1       | CT facial massive  | 1.00              |                    |              |           |             |           |                 |                  |
| 1       | MRI facial massive | <b>-0.18</b>      | 1.00               |              |           |             |           |                 |                  |
| 2       | MRI backbone       | -0.11             | 0.69*              | 1.00         |           |             |           |                 |                  |
| 2       | CT rachis          | 0.13              | -0.11              | <b>-0.25</b> | 1.00      |             |           |                 |                  |
| 3       | CT head            | 0.44*             | -0.13              | -0.18        | 0.36*     | 1.00        |           |                 |                  |
| 3       | MRI brain          | -0.05             | 0.23               | 0.21         | 0.15      | <b>0.14</b> | 1.00      |                 |                  |
| 4       | CT sup. abdomen    | 0.43*             | 0.11               | 0.30         | 0.16      | 0.20        | 0.04      | 1.00            |                  |
| 4       | MRI sup. abdomen   | -0.18             | 0.56*              | 0.71*        | 0.09      | -0.21       | -0.07     | <b>0.31</b>     | 1.00             |

\* p&lt;0.01

Table 2- Analysis of variance of both CT and MRI use rates (groups are the procedures).

|     | Source                                                                    | SS             | %           | df         | MS              | F      | Prob > F |
|-----|---------------------------------------------------------------------------|----------------|-------------|------------|-----------------|--------|----------|
| MRI | Between groups                                                            | 0.030646       | 90%         | 31         | 0.000989        | 265.17 | 0        |
|     | Within groups                                                             | 0.003571       | 10%         | 958        | 3.73E-06        |        |          |
|     | <i>Total</i>                                                              | <i>0.03422</i> | <i>100%</i> | <i>989</i> | <i>3.5E-05</i>  |        |          |
| CT  | Between groups                                                            | 0.005658       | 71%         | 27         | 0.00021         | 74.94  | 0        |
|     | Within groups                                                             | 0.002324       | 29%         | 831        | 2.80E-06        |        |          |
|     | <i>Total</i>                                                              | <i>0.00798</i> | <i>100%</i> | <i>858</i> | <i>9.30E-06</i> |        |          |
| MRI | Bartlett's test for equal variances: chi2(31) = 4.1e+03 Prob>chi2 = 0.000 |                |             |            |                 |        |          |
| CT  | Bartlett's test for equal variances: chi2(27) = 1.5e+03 Prob>chi2 = 0.000 |                |             |            |                 |        |          |

Table 3 – The list of use rate procedures with the highest standard deviation

| Use rates of                       | Across districts standard deviations 2009 |
|------------------------------------|-------------------------------------------|
| MRI musculoskeletal                | 7.07                                      |
| MRI backbone                       | 6.95                                      |
| CT rachis                          | 5.02                                      |
| CT head                            | 3.6                                       |
| CT complete abdomen with contrast  | 2.92                                      |
| CT superior abdomen with contrast  | 2.55                                      |
| CT chest with contrast             | 2.1                                       |
| CT chest                           | 2.01                                      |
| CT lower extremity                 | 1.67                                      |
| RMI brain                          | 1.6                                       |
| RMI brain with contrast            | 1.56                                      |
| CT facial massive                  | 1.35                                      |
| CT head with contrast              | 0.91                                      |
| RMI backbone with contrast         | 0.72                                      |
| CT neck with contrast              | 0.63                                      |
| MRI facial massive with contrast   | 0.49                                      |
| MRI musculoskeletal with contrast  | 0.48                                      |
| Angio RMI                          | 0.43                                      |
| MRI superior abdomen with contrast | 0.36                                      |
| MRI facial massive                 | 0.34                                      |

Table 4 The overall correlation matrix among volumes, efficiency, capacity, waiting times and recourse to private providers

|            |                               | MRI              |                        |                  |                      |                             |                       |                               |                  |                  |               | CT               |                        |                  |                      |                             |                       |                               |                  |                  |               |
|------------|-------------------------------|------------------|------------------------|------------------|----------------------|-----------------------------|-----------------------|-------------------------------|------------------|------------------|---------------|------------------|------------------------|------------------|----------------------|-----------------------------|-----------------------|-------------------------------|------------------|------------------|---------------|
|            |                               | Efficiency       |                        | Capacity         |                      |                             | Private               | Volumes                       |                  | Times            | Efficiency    |                  | Capacity               |                  |                      | Private                     | Volumes               |                               | Times            |                  |               |
|            |                               | Scan efficiency  | Radiologist efficiency | Staff efficiency | Scan per inhabitants | Radiologist per inhabitants | Staff per inhabitants | %service delivered by private | Use rates        | Public use rates | Waiting Times | Scan efficiency  | Radiologist efficiency | Staff efficiency | Scan per inhabitants | Radiologist per inhabitants | Staff per inhabitants | %service delivered by private | Use rates        | Public use rates | Waiting Times |
| Efficiency | Scan efficiency               | 1                |                        |                  |                      |                             |                       |                               |                  |                  |               | 1                |                        |                  |                      |                             |                       |                               |                  |                  |               |
|            | Radiologist efficiency        | 0.0788<br>0.8078 | 1                      |                  |                      |                             |                       |                               |                  |                  |               | 0.2216<br>0.4888 | 1                      |                  |                      |                             |                       |                               |                  |                  |               |
|            | Staff efficiency              | 0.5275<br>0.078  | 0.8131<br>0.0013       | 1                |                      |                             |                       |                               |                  |                  |               | 0.4521<br>0.14   | 0.817<br>0.0012        | 1                |                      |                             |                       |                               |                  |                  |               |
| Capacity   | Scan per inhabitants          | 0.4495<br>0.1427 | 0.8416<br>0.0006       | 0.9104<br>0      | 1                    |                             |                       |                               |                  |                  |               | 0.6173<br>0.0325 | 0.4171<br>0.1773       | 0.3067<br>0.3322 | 1                    |                             |                       |                               |                  |                  |               |
|            | Radiologist per inhabitants   | 0.1887<br>0.557  | 0.4507<br>0.1414       | 0.3739<br>0.2312 | 0.596<br>0.0408      | 1                           |                       |                               |                  |                  |               | 0.0299<br>0.9265 | 0.8122<br>0.0013       | 0.4847<br>0.1103 | 0.1716<br>0.5939     | 1                           |                       |                               |                  |                  |               |
|            | Staff per inhabitants         | 0.6341<br>0.0268 | 0.4748<br>0.1189       | 0.02<br>0.9508   | 0.2942<br>0.3533     | 0.7496<br>0.005             | 1                     |                               |                  |                  |               | 0.3789<br>0.2246 | 0.6572<br>0.0202       | 0.8259<br>0.0009 | -0.057<br>0.8604     | 0.6346<br>0.0266            | 1                     |                               |                  |                  |               |
| Private    | %service delivered by private | 0.28<br>0.3781   | 0.8058<br>0.0016       | 0.8455<br>0.0005 | 0.9191<br>0          | -0.741<br>0.0058            | 0.4352<br>0.1573      | 1                             |                  |                  |               | 0.1636<br>0.6114 | 0.7513<br>0.0049       | 0.7322<br>0.0068 | 0.5105<br>0.0899     | 0.522<br>0.0817             | 0.6129<br>0.0341      | 1                             |                  |                  |               |
| Volumes    | Use rates                     | 0.5402<br>0.0698 | 0.5387<br>0.0707       | 0.2023<br>0.5283 | 0.1772<br>0.5816     | 0.192<br>0.55               | 0.4798<br>0.1144      | 0.1129<br>0.7268              | 1                |                  |               | 0.0957<br>0.7674 | 0.4271<br>0.1662       | 0.2436<br>0.4456 | 0.2243<br>0.4834     | 0.4802<br>0.1141            | 0.1344<br>0.6772      | 0.0725<br>0.8228              | 1                |                  |               |
|            | Public use rates              | 0.1335<br>0.6792 | 0.9033<br>0.0001       | 0.8429<br>0.0006 | 0.9149<br>0          | 0.7373<br>0.0062            | 0.5395<br>0.0702      | 0.9633<br>0                   | 0.3634<br>0.2457 | 1                |               | 0.263<br>0.4089  | 0.3699<br>0.2366       | 0.5014<br>0.0968 | 0.2821<br>0.3743     | 0.1249<br>0.6988            | 0.4652<br>0.1275      | 0.8201<br>0.0011              | 0.4483<br>0.1439 | 1                |               |
| Waiting    | Waiting                       | -                | 0.1737                 | 0.188            | 0.2542               | 0.0059                      | -                     | -                             | 0.2384           | 0.1315           | 1             | -                | -                      | -                | -0.274               | 0.0866                      | -                     | 0.4088                        | 0.1193           | -                | 1             |

|       |                     |               |               |               |               |               |               |               |               |               |  |  |  |               |               |               |               |              |               |               |              |               |
|-------|---------------------|---------------|---------------|---------------|---------------|---------------|---------------|---------------|---------------|---------------|--|--|--|---------------|---------------|---------------|---------------|--------------|---------------|---------------|--------------|---------------|
| times | Times               | 0.1195        |               |               |               |               | 0.0321        | 0.0568        |               |               |  |  |  | 0.0268        | 0.1965        | 0.1096        |               | 0.0078       |               | 0.3175        |              |               |
|       |                     | <i>0.7113</i> | <i>0.5892</i> | <i>0.5584</i> | <i>0.4253</i> | <i>0.9856</i> | <i>0.9211</i> | <i>0.8607</i> | <i>0.4556</i> | <i>0.6837</i> |  |  |  | <i>0.9341</i> | <i>0.5404</i> | <i>0.7346</i> | <i>0.3887</i> | <i>0.789</i> | <i>0.9809</i> | <i>0.1871</i> | <i>0.712</i> | <i>0.3145</i> |
|       | p values in italics |               |               |               |               |               |               |               |               |               |  |  |  |               |               |               |               |              |               |               |              |               |

For peer review only

1  
2  
3  
4  
5  
6  
7  
8  
9  
10  
11  
12  
13  
14  
15  
16  
17  
18  
19  
20  
21  
22  
23  
24  
25  
26  
27  
28  
29  
30  
31  
32  
33  
34  
35  
36  
37  
38  
39  
40  
41  
42  
43  
44  
45  
46  
47  
48  
49

### Acknowledgements

We thank Dr. Claudio Vignali (Director of the radiology department of the LHA 12 of Viareggio), Daniele Di Feo (responsible for the radiologist technical staff of Meyer teaching hospital) and all the LHAs' management for their worthy suggestions and collaboration. We also thank the participants of the "Wennberg International Collaborative Conference" held in London in September 2010. A particular acknowledgement to Prof. Gwyn Bevan and Prof. David C. Goodman for their comments on the earlier version of this paper.

For peer review only

## References

1. Guyatt GH, Tugwell PX, Feeny DH, Haynes RB, Drummond M. A framework for clinical evaluation of diagnostic technologies. *Canadian Medical Association Journal* 1986; 134:587-94.
2. Hendel RC. Utilization Management of Cardiovascular Imaging: Pre-certification and Appropriateness. *Journal of the American college of Cardiology: Cardiovascular Imaging* 2008;1:241-8.
3. Miller MM. MedPAC recommendations on imaging services. Medicare Payment Advisory Commission, 2005.
4. Blackmore CC. Defining Quality in Radiology. *The Journal of the American College of Radiology* 2007;4:217-23.
5. Smith-Bindman R, Miglioretti DL, Larson EB. Rising use of diagnostic medical imaging in a large integrated health system. *Health Affairs* 2008;27(6): 1491-1502
6. Lysdahl K.B. and Børretzen I. Geographical variation in radiological services: nationwide survey. *BMC Health Services Research*. 2007;7-21
7. Song Y, Skinner J, Bynum J, Sutherland J, Wennberg JE, Fisher ES. Regional Variation in Diagnostic Procedures. *The New England Journal Of Medicine*, 2010. 363(1): 45-53
8. Cislighi C, Giuliani F Out of pocket sanitario nelle regioni italiane *I quaderni di Monitor*, 2008;22:161-177.
9. Vainieri M. Che cosa influenza la soddisfazione dei cittadini toscani nei servizi territoriali di base? *Salute e Territorio* 2006;156: 137-156
10. Censis. I modelli decisionali nella sanità locale. Roma, 2008.
11. Bhargavan M, Sunshine JH. Utilization of radiology services in the United States: levels and trends in modalities, regions and populations. *Radiology* 2005; 234:824-832.
12. Lysdahl KB, Hofmann BM. What causes increasing and unnecessary use of radiological investigations? A survey of radiologists' perceptions. *BMC Health Services Research* 2009; 9:155
13. Nuti S, Barsanti S. *Il Sistema di valutazione della performance della sanità toscana - REPORT 2009 Società della Salute/Zone-Distretto*. Pisa: Edizioni ETS, 2010.
14. Wennberg EJ. *Tracking medicine*. Oxford: University Press, 2010.
15. Bevan G, Hollinghurst S, Benton P, Spark V, Sanderson H, Franklin D. Using information on variation in rates of supply to question professional discretion in public services. *Financial Accountability & Management* 2004; 20(1):1-17.
16. Lee TH. Turning doctors into leaders. *Harvard Business Review*. 2010; April:50-8.
17. Emery DJ, Forster A.J., Shojania KG, Magnan S. Management of MRI Wait Lists in Canada. *Healthcare Policy*. 2009; 4(3)
18. Appleby J, Raleigh V, Frosini F, Bevan G, Gao H, Lyscom T. *Variation in healthcare*. The King's Fund. 2011
19. Nuti S, Vainieri M, Bonini A. Disinvestment for re-allocation: A process to identify priorities in healthcare. *Health Policy* 2010; 95:137-43.
20. Sirm-Snr. Metodologia di determinazione dei volumi di attività e della produttività dei medici radiologi- Nomenclatore Sirm – Snr Delle Prestazioni Radiologiche. Genova: OMICRON, 2006.
21. Jonsson S, Lukka K. *Doing interventionist research in management accounting*. Goteborg: Gothenburg Research Institute, 2005.
22. Kasanen E, Lukka K, Siitonen A. The constructive approach in management accounting research. *J Manag Acc Res* 1993;5(Fall):243-64

1  
2  
3  
4  
5  
6  
7  
8  
9  
10  
11  
12  
13  
14  
15  
16  
17  
18  
19  
20  
21  
22  
23  
24  
25  
26  
27  
28  
29  
30  
31  
32  
33  
34  
35  
36  
37  
38  
39  
40  
41  
42  
43  
44  
45  
46  
47  
48  
49  
50  
51  
52  
53  
54  
55  
56  
57  
58  
59  
60

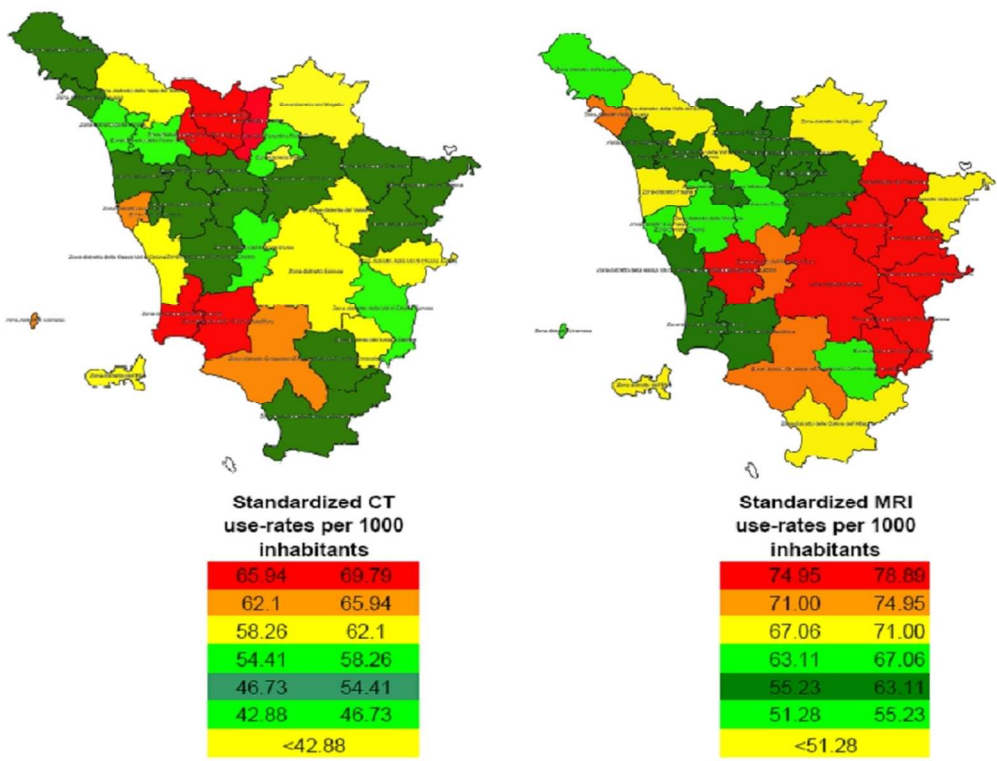

Figure 1 - CT and MRI use rates per 1000 inhabitants in the Tuscan districts.

113x90mm (300 x 300 DPI)

ew only



1  
2  
3  
4  
5  
6  
7  
8  
9  
10  
11  
12  
13  
14  
15  
16  
17  
18  
19  
20  
21  
22  
23  
24  
25  
26  
27  
28  
29  
30  
31  
32  
33  
34  
35  
36  
37  
38  
39  
40  
41  
42  
43  
44  
45  
46  
47  
48  
49  
50  
51  
52  
53  
54  
55  
56  
57  
58  
59  
60

|                        |                                                                                            |                                                                                       |
|------------------------|--------------------------------------------------------------------------------------------|---------------------------------------------------------------------------------------|
| +<br>Waiting time<br>- | IV quadrant<br>• Problem of efficiency ?<br>• Problem of supply structure (insufficient) ? | III quadrant<br>• Problem of overuse?<br>• Problem of efficiency?                     |
|                        | II quadrant<br>• Problem of underuse ?                                                     | I quadrant<br>• Problem of overuse?<br>• Problem of supply structure (overstructured) |
|                        | -                                                                                          | +                                                                                     |
|                        | Volumes per inhabitants                                                                    |                                                                                       |

Figure 2 -The logical framework to cope with long waiting times and their relationship with volumes.

177x90mm (300 x 300 DPI)

Peer review only

1  
2  
3  
4  
5  
6  
7  
8  
9  
10  
11  
12  
13  
14  
15  
16  
17  
18  
19  
20  
21  
22  
23  
24  
25  
26  
27  
28  
29  
30  
31  
32  
33  
34  
35  
36  
37  
38  
39  
40  
41  
42  
43  
44  
45  
46  
47  
48  
49  
50  
51  
52  
53  
54  
55  
56  
57  
58  
59  
60

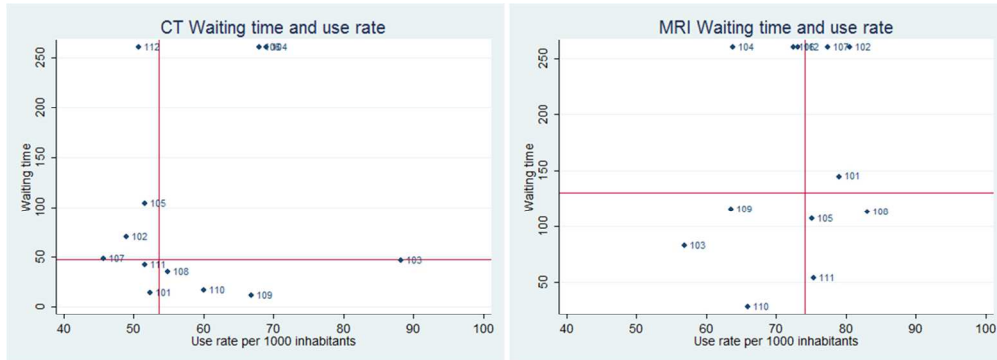

Figure 3 - The matrix for waiting times and volumes of CT and MRI.

peer review only

1  
2  
3  
4  
5  
6  
7 **Title: Managing waiting times in diagnostic medical imaging.**

8  
9 Authors: Sabina Nuti and Milena Vainieri

10  
11 Institution: Laboratorio Management e Sanità , Institute of Management, Scuola Superiore  
12 Sant'Anna, Piazza Martiri della Libertà,24, 56127 Pisa, Italy.

13  
14 Corresponding author: Sabina Nuti

15 Postal address:Laboratorio Management e Sanità , Institute of Management, Scuola Superiore  
16 Sant'Anna, Piazza Martiri della Libertà,24, 56127 Pisa, Italy.

17 Email address: m.[vainieri@sssup.it](mailto:vainieri@sssup.it),

18 Phone number: +39050883996

Field Code Changed

19  
20 Keywords: total quality management, diagnostic imaging, waiting list, organizational productivity,  
21 organizational decision making, health service administration.

22 | Word count (excluding title page, abstract, references, figures and tables) 4564.4651

**Abstract****Objective**

This paper aims to analyze the variation in the delivery of diagnostic imaging services in order to suggest possible solutions for the reduction of waiting times, increase the quality of services and reduce financial costs.

**Design**

This study provides a logic model to manage waiting times in a regional context. Waiting times measured per day were compared on the basis of the variability in the use rates of CT and MRI examinations in Tuscany for the population, as well as on the basis of the capacity offered with respect to the number of radiologists available. The analysis was performed at the local health authority level to support the decision-making process of local managers.

Setting: diagnostic imaging services, in particular the CT and MRI exams. The study involved all the 12 local health authorities that provide services for 3.7 million inhabitants of the Italian Tuscany Region.

Primary and secondary outcome measures:

Participants: The study uses regional administrative data on outpatients and survey data on inpatient diagnostic exams in order to measure productivity.

Primary and secondary outcome measures: The study uses the volumes per 1000 inhabitants, the days of waiting times and the number of exams per radiologist. Variability was measured using the traditional standard deviation measures.

**Results**

A significant variation in areas considered homogeneous in terms of age, gender or mortality may indicate that the use of radiological services is not optimal and underuse or overuse occurs and that there is room for improvement in the service organization.

**Conclusions**

Considering that there is a high level of variability among district use rates and waiting times, this study provides managers with a specific tool to find the cause of the problem, identify a possible solution, assess the financial impact and initiate the eventual reduction of waste.

**Article summary**

Article focus: Which factors explain the variability in waiting times and in the use of computed tomography (CT) and magnetic resonance imaging (MRI) examination rates? This article aims to analyze the relationships among radiologists' productivity, use rates and waiting times in the Tuscan Region. Moreover, it proposes a logical tool to help managers deal with this complex issue.

Key messages: The results reveal a high level of variability among the DI use rates of LHAs. The factors that may affect these results do not involve private providers or substitution effects between similar procedures. Monitoring the appropriateness phase of the prescription becomes critical when it is difficult to ensure acceptable waiting times which could be due to high volumes of the diagnostic imaging services delivered or may depend on inefficiency or a lack of professional resources (e.g. the number of radiologists). In Tuscany there is no correlation among scans/radiologists, volumes and waiting times. This could lead to the hypothesis that the management of waiting times cannot be generalized and depends on other factors that are strictly related to the local organizational decisions. Finally, the paper proposes a logical framework to help policy makers and managers cope with waiting times and appropriateness.

Strengths and limitations: This study analyzes the variation on diagnostic imaging services throughout different perspectives (volumes, waiting times and productivity). It provides policy makers with a logical model to manage this variation. Limitations regard the generalization of results, as part of them may be referred only to the organizational features of the region analyzed (as for the productivity).

## Background

The epidemiological changes of the last 30 years have caused a reduction in acute care for populations and an exponential growth in the number of outpatient and diagnostic services. Moreover, technological innovations in the diagnostic sector have made services more efficient, but at the same time more expensive, thus increasing costs.

Citizens and physicians increasingly request diagnostic services, often without considering their possible negative effects, such as radiation caused by CT examinations. It appears that the offer of diagnostic services does not cover the demand from patients, thus causing waiting lists to be increasingly longer and patients to be highly unsatisfied.

Policy makers must therefore face a complex situation resulting from longer waiting times, the increasing demand of diagnostic services from patients and increasing costs.

Which mechanisms may be adopted in order to face such situations and assist managers of public health systems to identify the causes of the problem and possible solutions?

On one hand, the regional health system, with a universal coverage mission, should provide an adequate number of DI services to grant equity of access to all citizens and should deliver such services in a timely fashion and according to patients' needs. On the other hand, it should reduce the patients' radiation exposure and the inappropriate duplication of exams as much as possible.

The World Health Organization (WHO) argues that the use rates of DI services should be adapted to the local needs and should be determined by (i) the type and size of the hospital; (ii) the number and type of patients: disease burden, inpatients and outpatients; and (iii) the therapeutic capabilities. Guyatt et al.<sup>1</sup> underlined the importance of accounting for the reassuring effect of an investigation on the wellness of a worried patient, while Hendel<sup>2</sup> suggested that intangible factors, local practice and clinical judgment must be carefully considered in the DI procedure appropriateness assessment.

Certainly, the huge growth of DI procedures observed in the last years raises concern about a possible overuse of these services<sup>2 3 4 5</sup>. According to the European referral guidelines for imaging, the causes of DI service overuse are multiple: repeated investigations, investigations performed although unlikely to affect patient management and premature or incorrect investigations.

Miller<sup>3</sup> (2005) and Lysdahl and Børretzen<sup>6</sup> observed that the number of supplied DI services is very different among geographical areas and that, often, geographical areas that supply a larger number of DI services do not present better health outcomes for the inhabitants. Song et al.<sup>7</sup> reported that there was no evidence of a survival benefit among people who moved to regions with a higher intensity level of procedures compared to those who moved to lower-intensity regions.

These results suggest that the analysis of the DI services variability across geographical regions could be an important step toward the understanding of the primary determinants of DI procedure growth rates and toward a definition of appropriate use standards. A significant variation in areas considered homogeneous in terms of age, gender or mortality may indicate that use of radiological services is not optimal and underuse or overuse occurs.

This paper presents the results of a research project aiming at exploring the factors that explain the variability in waiting times and the use of computed tomography (CT) and magnetic resonance imaging (MRI) examination rates in Tuscany. The final purpose of the project is to support the regional administration planning process regarding resource allocation and to set standards and goals for local health authorities (LHAs).

### The Tuscan context and the research questions

The Italian National Health System is based on the principle of universal coverage and it is financed by general taxation. Following the decentralization process that started in the 90s, regions are responsible for organizing and providing healthcare services, while the national level has to ensure universal coverage for the whole population. 82% of healthcare expenditure is public (Source: OECD data 2009). The remaining 18% of private expenses for healthcare mainly concerns dental care and some other few specialist visits, copayment and drugs. Healthcare services can be provided

1  
2  
3  
4  
5  
6  
7 by both private and public institutions, their mix varies within Italian Regions. In Tuscany over  
8 90% of services are provided by public institutions.

9 In particular, CT and MRI exams are mainly covered by public expenditure and the few private  
10 providers of diagnostic imaging services work under contract with the public health authorities. The  
11 last Italian survey on citizens' behavior and consumptions, carried out on 2005 by the Italian  
12 National Institute of Statistics, demonstrated that more than 80% of diagnostic services are covered  
13 by public expenditure and copayment. The percentage of DI covered by out of pocket varies across  
14 Italian Regions. In Tuscany the percentage is about 16% (vs the Italian average of 20%), thus only a  
15 minor number of DI services is not registered into the regional administrative data<sup>8</sup>.

16 The Tuscan region reallocates resources among Local Health Authorities using the regional  
17 capitation formula. Hence, LHAs are responsible for the resource allocation process of all the  
18 healthcare services. To achieve this task, LHAs are in charge of organizing the supply structure and  
19 consequently they define the number of specialists and the equipment to be dedicated to diagnostic  
20 imaging.

21 The overall economic value of services such as computed tomography (CT) and magnetic  
22 resonance imaging (MRI) in Tuscany is around 65 million Euros (about 1% of the regional budget).  
23 The volume of these services for the 3.7 million of residents is one of the highest in Italy (Italian  
24 Ministry of Health [www.salute.gov.it](http://www.salute.gov.it)). Despite high volumes, the actual offerings in Tuscany seem  
25 to not be enough.

26 In 2010, waiting times in Tuscany were more than 60 days on average; however, for some LHAs,  
27 waiting times reached up to 90 days; variability appeared to be very great: waiting times went  
28 from 14 to 260 days. Moreover, citizens claim that waiting times are quite long; this is the main reason  
29 why some of them choose the private supplier (see for instance the results of 2005 survey directed  
30 to population<sup>9</sup>).

31 Tuscan policy makers, therefore, consider waiting times to be one of the most important challenges  
32 to achieve, also because the National Government requested these diagnostic services to be  
33 delivered to patients within 30 days (Piano Nazionale di Governo delle Liste di Attesa –PNGLA-  
34 2010- 2012).

35 As regards the use rates per inhabitant standardized by age and sex, great variability (for MRI and  
36 CT) was registered in 2009 and 2010: CT use rates went from 45 to 88 per 1000 inhabitants, while  
37 the MRI use rates went from 56 to 83 per 1000 inhabitants.

38 The results indicate that, although Tuscany is a homogenous territory from a socio-demographic  
39 perspective and represents excellence within the Italian regions in terms of quality of healthcare and  
40 governance<sup>10</sup>, there is great variability across the region in terms of both waiting times and DI use  
41 rates.

42 Geographical variation in the DI use rates may constitute overuse or underuse with a consequent  
43 risk of inappropriateness of the service<sup>6</sup>. Bhargavan and Sunshine<sup>11</sup> highlighted great variability in  
44 the provision of DI services across areas and suggested that the use of appropriateness criteria, such  
45 as those defined by the ACR, may minimize these differences. Moreover, they explored this  
46 variability to highlight the state-level variables that affect it most, and they observed that the greater  
47 the number of Medicare providers, the greater the DI investigation rate per 1000 inhabitants.  
48 However, it is worth highlighting that the variability across regions could be affected by other  
49 factors like the availability of diagnostic technologies, socio-economic factors (i.e., education,  
50 income) or the number of radiologists in the region<sup>6,12</sup>. Moreover, Lysdahl and Børretzen<sup>6</sup> observed  
51 that each area may present a propensity toward a particular procedure considered a reasonable  
52 approach for a specific indication, which may lead each area to present a substitution effect among  
53 procedures types. On the contrary, it is found that the high use of one modality does not correspond  
54 with low use of an alternative modality for specific organs (locations), supporting the assumption  
55 that overuse really exists in high-use areas, thus leading to potentially inappropriate resource  
56 allocation.

57 In 2010 the Tuscan region evaluated as inappropriate district areas that registered use rates of the



1  
2  
3  
4  
5  
6  
7 diagnostic imaging services far from the regional median use rate. Those districts may face the risk  
8 of an excessive number of radiation exposures (in the case that they are above the median) or a lack  
9 of services (in the case that they are lower than the median)<sup>13</sup>. This assumption yields some  
10 disadvantages because it does not take into account differences in medical procedures, where any  
11 decision involves a certain degree of discretion, the disease burden of particular areas, or patient  
12 preferences and outcomes<sup>14</sup>. However, Lysdahl and Børretzen<sup>6</sup> observed that the number of  
13 supplied DI services did not correspond to better health outcomes for inhabitants. Moreover, Song  
14 et al.<sup>7</sup> found that the mortality rate was not lower in areas presenting a high intensity of practices, as  
15 one could expect. Low-intensity and high-intensity areas present similar outcomes and, after three  
16 years, there is no evidence of a survival benefit among people who moved to higher intensity  
17 regions compared to those who moved to lower intensity regions.

18 Considering these premises, the present research investigated the relationship between volumes and  
19 waiting times to find out if long waiting times are determined by high volumes of diagnostic  
20 services delivered to residents, as well as to assess the impact of factors such as the presence of  
21 private suppliers and providers. Some authors<sup>15 16</sup> suggest that, when coping with variation in  
22 healthcare, managers have to show, discuss and monitor data to question professional discretion.  
23 Hence, we analyzed the following issues:

24 RQ1: Does variability in the DI rate depend on the presence of private medical providers?

25 RQ2: Is there a substitution effect among diagnostic procedures or a problem of procedure mix?

26 RQ3: What is the relationship between the volumes delivered and the waiting times?

27 The most common strategy to reduce waiting times is to increase the supply throughout, on the one  
28 hand the enhancement of the production capacity (i.e. boosting the opening hours of scans to  
29 perform more examinations per scan and increase the number of examinations per radiologist), and  
30 on the other hand the increase in personnel /equipment or the contracting out<sup>17</sup>. Boosting the supply  
31 structure may increase the volumes (indeed, capacity is one of the factors that could explain the  
32 variability, as reported by scholars<sup>6 12 14 18</sup>).

33 RQ5: Does the number of radiologists and scans available for each LHA or the percentage of  
34 services contracted out affect volumes and waiting times?

35 RQ6: Which tool may support policy makers and managers to cope with demand and waiting  
36 times?

37  
38 This paper presents some first evidence regarding the questions suggested and proposes a method to  
39 enhance the professional consciousness of specialists toward better resource allocation and  
40 performance management.

## 41 **Methods**

42 This study is based on empirical analyses. Data sources are both administrative data and surveys.  
43 Outpatient dataset includes all DI services provided to Tuscan inhabitants (in or out of the region  
44 and by public or private institutions) with the only exception of those exams full paid by patients.  
45 According to the last population survey conducted by the Italian National Institute of Statistics  
46 (Istat), in Tuscany the percentage of these exams should be around 16%.

47 To detect the first five research questions we run Pearson correlation and Anova analyses. In  
48 particular, we correlated the use rates and the percentage of examinations provided by private  
49 institutions for the RQ1, while we correlated the use rates of four couples of procedures for the  
50 RQ2. The four couples of potential substitute procedures were selected by radiologists and technical  
51 staff considering only the CT and MRI procedures and they are: the CT and MRI of the superior  
52 abdomen, the CT and MRI of the head and brain, the CT and MRI of the rachis and spine or the CT  
53 and MRI of the facial massive. We performed the one-way ANOVA to detect the variability across  
54 and within the CT(MRI) procedures' use-rates (RQ2). Further analyses for RQ2 were executed  
55

1  
2  
3  
4  
5  
6  
7 considering the twenty more frequent examinations of CT and MRI. This group approximately  
8 constitutes 90% of the total CT and MRI examinations performed in Tuscany in 2009. In addition to  
9 this analysis we provided a map of the number of examinations that exceed the regional median use  
10 rate per procedure across Tuscan LHAs in terms of financial value, following an approach similar to  
11 the one adopted by Nuti et al<sup>19</sup>.

12 For RQ4 we took into consideration: the number of radiologists and scans per inhabitants, the  
13 productivity scores of radiologists and the percentage of private services contracted out.

14 In particular, to calculate productivity indices two steps were followed.

15 The first step was to take into account the recommendations of the workload table developed by the  
16 Italian National Scientific Community of Radiologists published into an Italian report of 2006<sup>20</sup>. In  
17 this report radiologists, on the basis of their expertise and experience, argued that the time spent  
18 running examinations for young patients (less than 5 years old) is 25% (weight=1.25) greater than  
19 the time spent for patients between 5 and 79 years, while the time spent for elderly people (older  
20 than 79 years) is 15% (weight=1.15). Moreover, patients coming from the Emergency Department  
21 require the presence of radiologists and technicians for a longer period of time (estimated at 25%,  
22 weight=1.25), while inpatients require 15% (weight=1.15) of time more than outpatients. The  
23 corrected number of examinations was estimated using these weights. Other aspects presented in  
24 the workload report refer to some organizational issues, such as the changing room for patients or  
25 the presence of nurses, that can optimize the use of scans and personnel time. The research group  
26 considered these factors as part of the productivity that can be managed by LHAs, thus the only  
27 correction applied to efficiency indices refers to patient characteristics.

28 The second step regards the personnel. We conducted a survey collecting all personnel working in  
29 the DI departments. The personnel dedicated to CT (MRI) services was estimated using the  
30 workload table of the 2006 report<sup>a</sup> for the current DI examinations (both inpatients and outpatients)  
31 per health authority. This table reports the standard time radiologists spent to execute DI exams.  
32 The number of radiologists who deal only with CT (MRI) was estimated using the percentage of CT  
33 (MRI) exams (in terms of time) and the overall working time. The application of these weights and  
34 this deductive process of personnel identification were discussed with the research group, but also  
35 with the Italian National Scientific Community of Radiologists (SNR-SIRM) in 2011.

36 For the last research question, we followed the guidelines of an “interventionist research  
37 approach”. This approach aims to solve problems through the construction of models, diagrams,  
38 plans, organizations, etc., by means of the direct involvement of researchers and actors in  
39 “participant observations” in the field<sup>21</sup>. This method is used in a variety of fields: technical  
40 sciences, mathematics, operation analysis, clinical medicine and management control<sup>22</sup>.

41 Professionals were involved in detangling the DI variability and the management of waiting times.  
42 Radiologists, technical staff and management staff (such as the health and cost analysts) were  
43 involved in the research project.

44 Researchers facilitated the process, conducted the project while pointing out the questions and the  
45 research hypothesis, looked for articles that may support the perceived determinants of variability,  
46 collected data and ran statistical analyses to help professionals identify critical factors.

47 The calculations were based on the Tuscan outpatient dataset and on the Health Authority data for  
48 DI inpatients services, scans and personnel (collected by researchers via surveys).

## 49 Results

50  
51 <sup>a</sup> The table used is at page 12 of the report available on internet (only in Italian,  
52 [http://www.asppalermo.org/Archivio/circolari/dip\\_radiologia/metodo\\_nomencl\\_nuovo.pdf](http://www.asppalermo.org/Archivio/circolari/dip_radiologia/metodo_nomencl_nuovo.pdf) access September 2012). In  
53 this report where there are 16 groups of examinations, each group has the time requested to the specialist for the  
54 execution in terms of minutes and in comparison with the time spent for the rx chest that is the reference exam of this  
55 table. For instance, the rx chest requires 7,1 minutes, while the CT without contrast requires 19,8 minutes (2.8 times  
56 longer than the time required for the rx chest)

The starting point of this research was the observation of the large variation in the use rates of outpatient CT and MRI procedures in Tuscany across the Local Health Authorities (LHAs), which is even more drastic across districts. (Figure 1)–reports the appraisal made by the Tuscan Health System on the CT and MRI use rates in 2009. The colors identify the evaluation on the basis of the distance from the median use rate: better results are positioned closer to the median rate while worst results are positioned farther from the median because of the increasing risk of over/under use. The appraisal is organized into five colored bands: very good (dark green); good (green); medium (yellow); bad (orange) and very bad (red) performance.

Figure 1 – CT and MRI use rates per 1000 inhabitants in the Tuscan districts.

Was this difference determined by the presence of private institutions?(RQ1) The correlation analysis between the use rates and the percentage of examinations provided by private institutions demonstrates that high use rates do not significantly depend on the private sector's activity: for MRI the correlation was  $r=-0.11$  with a  $p=0.727$  and for CT the correlation was  $r=0.072$  with a  $p=0.823$ (see table 4). The fact that the presence of the private sector does not influence the variability confirms that it is not up to private providers to increase volumes, because their production is negotiated with the Tuscan LHAs which decide the percentage of services to be provided outside the public structure.

Regarding RQ2, scholars suggest that variability could be due to substitution effects between different modalities. Low use rates of one modality in the examination of specific organs could generally correspond to high use rates of an alternative modality. However, data do not support this hypothesis; the correlation matrix between two possibly substitutable modalities of analysis indicates that there is no statistically significant correlation between them (Table 1). A significant negative correlation would have suggested that high rates of one modality correspond to low rates of the other, suggesting a likely substitution effect between them.

Table 1 – Substitution effect between four couples.

This result is comforting because there should be specific guidelines on the use of each diagnostic modality. The correlation matrix (table1) also shows that there is positive and significant correlation between the use of some procedures, such as MRI backbone and superior abdomen, across the four groups. Similar results could be found in literature<sup>6</sup>.

Variability across Health Authorities and their district areas could depend on the over (under) use of specific examinations. Indeed, the one-way Anova analysis highlights that there is more variability between procedures (around 90% for MRI and 71% for CT) than within them (see table 2).

Table 2- Analysis of variance of both CT and MRI use rates (groups are the procedures).

Hence, the overall variability is mainly due to a different mix of procedures applied by the districts. Looking at the standard deviation across districts for the use-rates of the 20 most recurring procedures, it emerged that procedures with the highest level of variability across local areas are: MRI musculoskeletal; MRI backbone; CT rachis and CT head (see table 3).

Table 3 – The list of use rate procedures with the highest standard deviation

Appendix 1 for CT examinations and Appendix 2 for MRI examinations highlights the critical area

of inappropriateness for each district, providing managers with the amount of leeway they could obtain if they performed at the regional median.

For example, in the Apuane district, 90% of its leeway is concentrated on the musculoskeletal MRI, while there is no leeway for some other procedures (such as the Backbone MRI with contrast) because the use-rate is equal or lower than the regional median. At the regional level the resources that can be reallocated for MRI (around 5.5 million Euros ) are concentrated (57%) on the musculoskeletal and backbone examinations, while 42% of resources for CT (around 6 million Euros) are concentrated on the rachis and complete abdomen with contrast CT examinations.

Once we found out some of the factors that could affect variability in terms of volumes, we looked at the relationship between volumes delivered and waiting times (RQ3). In both the CT and MRI matrix LHAs high use rates are not correlated with longer waiting times. Indeed, the Pearson correlation (table 4) reports a  $r=0.238$  and  $p=0.455$  for CT and a  $r=0.11$  and  $p=0.712$  for MRI.

Table 4 The overall correlation matrix among volumes, efficiency, capacity, waiting times and recourse to private providers

As for the RQ4, table 4 shows that for both CT and MRI examinations the percentage of services delivered by private institutions, the number of scans and radiologists and their efficiency are not correlated with waiting times. Instead, correlations among capacity factors and volumes are different for CT and MRI. In the case of MRI capacity, radiologists and scans per inhabitants and their efficiency are positively correlated with public use-rate. Moreover, the significant negative correlation between the percentage of services delivered by private institutions and the public use rates can be interpreted as a designed strategy of contracting out where private suppliers integrate public offerings.

Unlike MRI services and other studies on variability<sup>14 18</sup>, CT services in Tuscany seem not to be supply sensitive: the number of radiologists, technical staff per inhabitant, scans and the volumes per inhabitant provided by public providers appear not to influence the demand. It is worth to be noted that radiologists are employed by LHAs and volumes do not influence their salary.

As regards the strategy of increasing the capacity to reduce waiting times, this seems not to be effective. In particular, it is expected that the contracting out is a strategy applied by LHAs once their production capacity is saturated. Indeed, data show (table 4) that a higher percentage of services delivered by private providers corresponds to a lower radiologists productivity score (-0.8 for MRI and -0.7 for CT both with a  $p<0.01$ ).

Thus, the recourse to private suppliers appears not to be cost-effective in Tuscany. LHAs with low productivity per radiologist could increase the number of examinations delivered by their public structures reducing the recourse to private providers. Hence, if all the radiologists working in public institutions had reached the maximum level of productivity, the reduction of examinations delivered by private institutions would have led to savings. Considering the actual number of scans at their maximum level of productivity and the fares of exams, these savings would have reached up to 10 million Euros (6 million for CT and 5 million for MRI).

In conclusion, the overall Pearson correlation matrix (table 4) highlighted that waiting times do not correlate with the factors selected (volumes, capacity and efficiency). Similar results could be obtained performing the Anova analysis on waiting times and volumes, capacity and efficiency (Adjusted R square is 18%, residuals are greater than 50% and no factor has a  $p<0.05$ ).

The fact that there is no correlation between the scans/radiologists, volumes and waiting times could lead to the hypothesis that the management of waiting times cannot be generalized and will depend on factors that are strictly related to the local organizational decisions.

For the last research question (which tools are necessary to help managers coping with volumes and waiting times), the research team developed a two-dimensional matrix where the x-axis shows the

1  
2  
3  
4  
5  
6  
7 use rate (the volumes per inhabitants) and the y axis reports the waiting times for CT or MRI.  
8 Using regional medians, the matrix identifies four quadrants:

- 9 1. short waiting times and high volumes per inhabitant
- 10 2. short waiting times and low volumes delivered
- 11 3. long waiting times and high volumes per inhabitant
- 12 4. long waiting times and low volumes delivered

13 This first classification yields the following hypothesis:

14 The institutions that belong to the first quadrant could risk delivering inappropriate services and/or  
15 have an excessive amount of resources at their disposal.

16 The institutions belonging to the second quadrant could risk substantially decreasing their supply of  
17 services or facing a problem in the quality of their services if their citizens decided to seek such  
18 services at other institutions.

19 The institutions that belong to the third quadrant could face problems in terms of appropriateness  
20 and production efficiency.

21 Finally, the institutions belonging to the fourth quadrant could face difficulties in terms of efficiency  
22 or inappropriate amount of resources.

23  
24 Figure 2 the logical framework to cope with long waiting times and their relationship with volumes.

25  
26  
27 Figure 3 illustrates the matrix of both CT and MRI volumes and waiting times. Results and  
28 conclusion coming from the analysis of the matrix and correlation for CT and MRI are similar. The  
29 figure 3 shows that LHAs are positioned in all the four quadrants for both CT and MRI; this  
30 highlights that LHAs can face different problems. Using the above logical framework, some LHAs  
31 (e.g. 106 and 104 for CT or 102 and 107 for MRI) positioned in the third quadrant (high volumes  
32 and high waiting times) could face problems in terms of appropriateness and (low) efficiency.  
33 Those LHAs positioned in the fourth quadrant (low volume, high waiting times) may face problems  
34 relating to their capacity (few personnel, few scans) or (low) efficiency.

35  
36 Figure 3 the matrix for waiting times and volumes of CT and MRI.

### 37 38 **Conclusions**

39 This paper provides an analysis of the variability in the use rates of CT and MRI examinations in  
40 Tuscany. The analysis has been performed at the LHA level (including district areas) to support the  
41 decision-making process of local managers.

42 Results reveal a high level of variability among the LHAs' (and district areas ) use rates. Why do  
43 some residents use these DI services much more than others? Factors that may affect these results  
44 do not involve private providers or substitution effects between similar procedures (correlation  
45 analyses were not significant). The Anova analysis showed that 71% for CT and 90% for MRI of  
46 variability are explained between groups (procedures); indeed, the analysis of procedure mix  
47 indicates that there are some procedures (e.g. CTs of the head) with high level of standard  
48 deviations. Thus, the relevant issue is about how to share and increase the responsibility of GPs and  
49 specialists in the prescription phase.

50 The monetary value attached to the exams that exceed the median use rates suggests that there is a  
51 broad margin of intervention and the need for policy makers and managers to find new and more  
52 effective ways to control appropriateness.

53 This analysis of use rates is a fundamental step to cope with long waiting times, but it is not enough.  
54 Strategies adopted to cope with waiting times usually concern the enhancement of capacity  
55 throughout efficiency, the number of scans and radiologists per inhabitants and the contracting out.

1  
2  
3  
4  
5  
6  
7 This paper proposes a logical approach to identify the critical areas for controlling variability in use  
8 rates and to find out if waiting times are determined by inefficiencies, a lack of appropriateness in  
9 the prescription phase or a lack of professional resources. The final aim of the paper is to help  
10 decision makers define the priorities of intervention. Financial considerations were also added with  
11 the aim to both enhance the specialists' competence and the economic consciousness through  
12 focus groups, and exploit the learning opportunities by comparing best practices.

13 The empirical analyses highlighted for both the CT and MRI examinations that waiting times in  
14 Tuscany are not affected by volumes or capacities. Moreover, unlike MRI and other studies on  
15 specialist care, it seems that the CT is not supply sensitive. Hence, the management of waiting  
16 times cannot be generalized and depends on other factors that are strictly related to the local  
17 organizational decisions. Moreover, this analysis highlighted that the Tuscan Region has to tackle  
18 with variation in volumes and high waiting times optimizing the productivity of personnel and  
19 scans; this can lead to a reduction of costs (as a consequence of a reduction of contracting out).

20 The matrix supports in this paper helped policy makers and top managers analyze the complex task  
21 of coping with long waiting times and appropriateness.

22 Even if there are some limitations in generalizing the results described in this paper, since they  
23 could be affected by macro (e.g. public system based on universal coverage) and micro (e.g. the  
24 supply structure) factors linked to the Tuscan context, the matrix proposed can be applied outside  
25 this context. The matrix and its logical framework may represent a practical managerial tool that  
26 supports the difficult and multi factors analysis of waiting times and appropriateness in delivering  
27 outpatient services.  
28  
29  
30  
31  
32  
33  
34  
35  
36  
37  
38  
39  
40  
41  
42  
43  
44  
45  
46  
47  
48  
49  
50  
51  
52  
53  
54  
55  
56  
57  
58  
59  
60



## Tables

Table 1 – Substitution effect between four couples.

| Couples | Investigations            | CT facial massive | MRI facial massive | MRI backbone | CT rachis | CT head     | MRI brain | CT sup. abdomen | MRI sup. abdomen |
|---------|---------------------------|-------------------|--------------------|--------------|-----------|-------------|-----------|-----------------|------------------|
| 1       | <b>CT facial massive</b>  | 1.00              |                    |              |           |             |           |                 |                  |
| 1       | <b>MRI facial massive</b> | <b>-0.18</b>      | 1.00               |              |           |             |           |                 |                  |
| 2       | <b>MRI backbone</b>       | -0.11             | 0.69*              | 1.00         |           |             |           |                 |                  |
| 2       | <b>CT rachis</b>          | 0.13              | -0.11              | <b>-0.25</b> | 1.00      |             |           |                 |                  |
| 3       | <b>CT head</b>            | 0.44*             | -0.13              | -0.18        | 0.36*     | 1.00        |           |                 |                  |
| 3       | <b>MRI brain</b>          | -0.05             | 0.23               | 0.21         | 0.15      | <b>0.14</b> | 1.00      |                 |                  |
| 4       | <b>CT sup. abdomen</b>    | 0.43*             | 0.11               | 0.30         | 0.16      | 0.20        | 0.04      | 1.00            |                  |
| 4       | <b>MRI sup. abdomen</b>   | -0.18             | 0.56*              | 0.71*        | 0.09      | -0.21       | -0.07     | <b>0.31</b>     | 1.00             |

\* p&lt;0.01

Table 2- Analysis of variance of both CT and MRI use rates (groups are the procedures).

|     | Source                                                                    | SS             | %           | df         | MS              | F      | Prob > F |
|-----|---------------------------------------------------------------------------|----------------|-------------|------------|-----------------|--------|----------|
| MRI | Between groups                                                            | 0.030646       | 90%         | 31         | 0.000989        | 265.17 | 0        |
|     | Within groups                                                             | 0.003571       | 10%         | 958        | 3.73E-06        |        |          |
|     | <i>Total</i>                                                              | <i>0.03422</i> | <i>100%</i> | <i>989</i> | <i>3.5E-05</i>  |        |          |
| CT  | Between groups                                                            | 0.005658       | 71%         | 27         | 0.00021         | 74.94  | 0        |
|     | Within groups                                                             | 0.002324       | 29%         | 831        | 2.80E-06        |        |          |
|     | <i>Total</i>                                                              | <i>0.00798</i> | <i>100%</i> | <i>858</i> | <i>9.30E-06</i> |        |          |
| MRI | Bartlett's test for equal variances: chi2(31) = 4.1e+03 Prob>chi2 = 0.000 |                |             |            |                 |        |          |
| CT  | Bartlett's test for equal variances: chi2(27) = 1.5e+03 Prob>chi2 = 0.000 |                |             |            |                 |        |          |

Table 3 – The list of use rate procedures with the highest standard deviation

| Use rates of                       | Across districts standard deviations 2009 |
|------------------------------------|-------------------------------------------|
| MRI musculoskeletal                | 7.07                                      |
| MRI backbone                       | 6.95                                      |
| CT rachis                          | 5.02                                      |
| CT head                            | 3.6                                       |
| CT complete abdomen with contrast  | 2.92                                      |
| CT superior abdomen with contrast  | 2.55                                      |
| CT chest with contrast             | 2.1                                       |
| CT chest                           | 2.01                                      |
| CT lower extremity                 | 1.67                                      |
| RMI brain                          | 1.6                                       |
| RMI brain with contrast            | 1.56                                      |
| CT facial massive                  | 1.35                                      |
| CT head with contrast              | 0.91                                      |
| RMI backbone with contrast         | 0.72                                      |
| CT neck with contrast              | 0.63                                      |
| MRI facial massive with contrast   | 0.49                                      |
| MRI musculoskeletal with contrast  | 0.48                                      |
| Angio RMI                          | 0.43                                      |
| MRI superior abdomen with contrast | 0.36                                      |
| MRI facial massive                 | 0.34                                      |

Table 4 The overall correlation matrix among volumes, efficiency, capacity, waiting times and recourse to private providers

|            |                               | MRI              |                        |                  |                      |                             |                       |                               |                  |                  | CT               |                  |                        |                  |                      |                             |                       |                               |           |                  |               |
|------------|-------------------------------|------------------|------------------------|------------------|----------------------|-----------------------------|-----------------------|-------------------------------|------------------|------------------|------------------|------------------|------------------------|------------------|----------------------|-----------------------------|-----------------------|-------------------------------|-----------|------------------|---------------|
|            |                               | Scan efficiency  | Radiologist efficiency | Staff efficiency | Scan per inhabitants | Radiologist per inhabitants | Staff per inhabitants | %service delivered by private | Use rates        | Public use rates | Waiting Times    | Scan efficiency  | Radiologist efficiency | Staff efficiency | Scan per inhabitants | Radiologist per inhabitants | Staff per inhabitants | %service delivered by private | Use rates | Public use rates | Waiting Times |
| Efficiency | Scan efficiency               | 1                |                        |                  |                      |                             |                       |                               |                  |                  |                  | 1                |                        |                  |                      |                             |                       |                               |           |                  |               |
|            | Radiologist efficiency        | 0.0788<br>0.8078 | 1                      |                  |                      |                             |                       |                               |                  |                  | 0.2216<br>0.4888 | 1                |                        |                  |                      |                             |                       |                               |           |                  |               |
|            | Staff efficiency              | 0.5275<br>0.078  | 0.8131<br>0.0013       | 1                |                      |                             |                       |                               |                  |                  | 0.4521<br>0.14   | 0.817<br>0.0012  | 1                      |                  |                      |                             |                       |                               |           |                  |               |
| Capacity   | Scan per inhabitants          | 0.4495<br>0.1427 | 0.8416<br>0.0006       | 0.9104<br>0      | 1                    |                             |                       |                               |                  |                  | 0.6173<br>0.0325 | 0.4171<br>0.1773 | 0.3067<br>0.3322       | 1                |                      |                             |                       |                               |           |                  |               |
|            | Radiologist per inhabitants   | 0.1887<br>0.557  | 0.4507<br>0.1414       | 0.3739<br>0.2312 | 0.596<br>0.0408      | 1                           |                       |                               |                  |                  | 0.0299<br>0.9265 | 0.8122<br>0.0013 | 0.4847<br>0.1103       | 0.1716<br>0.5939 | 1                    |                             |                       |                               |           |                  |               |
|            | Staff per inhabitants         | 0.6341<br>0.0268 | 0.4748<br>0.1189       | 0.02<br>0.9508   | 0.2942<br>0.3533     | 0.7496<br>0.005             | 1                     |                               |                  |                  | 0.3789<br>0.2246 | 0.6572<br>0.0202 | 0.8259<br>0.0009       | -0.057<br>0.8604 | 0.6346<br>0.0266     | 1                           |                       |                               |           |                  |               |
| Private    | %service delivered by private | 0.28<br>0.3781   | 0.8058<br>0.0016       | 0.8455<br>0.0005 | 0.9191<br>0          | -0.741<br>0.0058            | 0.4352<br>0.1573      | 1                             |                  |                  | 0.1636<br>0.6114 | 0.7513<br>0.0049 | 0.7322<br>0.0068       | 0.5105<br>0.0899 | 0.522<br>0.0817      | 0.6129<br>0.0341            | 1                     |                               |           |                  |               |
| Volumes    | Use rates                     | 0.5402<br>0.0698 | 0.5387<br>0.0707       | 0.2023<br>0.5283 | 0.1772<br>0.5816     | 0.192<br>0.55               | 0.4798<br>0.1144      | 0.1129<br>0.7268              | 1                |                  | 0.0957<br>0.7674 | 0.4271<br>0.1662 | 0.2436<br>0.4456       | 0.2243<br>0.4834 | 0.4802<br>0.1141     | 0.1344<br>0.6772            | 0.0725<br>0.8228      | 1                             |           |                  |               |
|            | Public use rates              | 0.1335<br>0.6792 | 0.9033<br>0.0001       | 0.8429<br>0.0006 | 0.9149<br>0          | 0.7373<br>0.0062            | 0.5395<br>0.0702      | 0.9633<br>0                   | 0.3634<br>0.2457 | 1                | 0.263<br>0.4089  | 0.3699<br>0.2366 | 0.5014<br>0.0968       | 0.2821<br>0.3743 | 0.1249<br>0.6988     | 0.4652<br>0.1275            | 0.8201<br>0.0011      | 0.4483<br>0.1439              | 1         |                  |               |
| Waiting    | Waiting                       | -                | 0.1737                 | 0.188            | 0.2542               | 0.0059                      | -                     | -                             | 0.2384           | 0.1315           | 1                | -                | -                      | -                | -0.274               | 0.0866                      | -                     | 0.4088                        | 0.1193    | -                | 1             |

1  
2  
3  
4  
5  
6  
7  
8  
9  
10  
11  
12  
13  
14  
15  
16  
17  
18  
19  
20  
21  
22  
23  
24  
25  
26  
27  
28  
29  
30  
31  
32  
33  
34  
35  
36  
37  
38  
39  
40  
41  
42  
43  
44  
45  
46  
47  
48  
49

|       |       |               |               |               |               |               |               |               |               |               |  |               |               |               |               |              |               |               |              |               |
|-------|-------|---------------|---------------|---------------|---------------|---------------|---------------|---------------|---------------|---------------|--|---------------|---------------|---------------|---------------|--------------|---------------|---------------|--------------|---------------|
| times | Times | 0.1195        |               |               |               | 0.0321        | 0.0568        |               |               |               |  | 0.0268        | 0.1965        | 0.1096        |               | 0.0078       |               | 0.3175        |              |               |
|       |       | <i>0.7113</i> | <i>0.5892</i> | <i>0.5584</i> | <i>0.4253</i> | <i>0.9856</i> | <i>0.9211</i> | <i>0.8607</i> | <i>0.4556</i> | <i>0.6837</i> |  | <i>0.9341</i> | <i>0.5404</i> | <i>0.7346</i> | <i>0.3887</i> | <i>0.789</i> | <i>0.9809</i> | <i>0.1871</i> | <i>0.712</i> | <i>0.3145</i> |

p values in italics

For peer review only

## Acknowledgements

We thank Dr. Claudio Vignali (Director of the radiology department of the LHA 12 of Viareggio), Daniele Di Feo (responsible for the radiologist technical staff of Meyer teaching hospital) and all the LHAs' management for their worthy suggestions and collaboration. We also thank the participants of the "Wennberg International Collaborative Conference" held in London in September 2010. A particular acknowledgement to Prof. Gwyn Bevan and Prof. David C. Goodman for their comments on the earlier version of this paper.

## References

1. Guyatt GH, Tugwell PX, Feeny DH, Haynes RB, Drummond M. A framework for clinical evaluation of diagnostic technologies. *Canadian Medical Association Journal* 1986; 134:587-94.
2. Hendel RC. Utilization Management of Cardiovascular Imaging: Pre-certification and Appropriateness. *Journal of the American college of Cardiology: Cardiovascular Imaging* 2008;1:241-8.
3. Miller MM. MedPAC recommendations on imaging services. Medicare Payment Advisory Commission, 2005.
4. Blackmore CC. Defining Quality in Radiology. *The Journal of the American College of Radiology* 2007;4:217-23.
5. Smith-Bindman R, Miglioretti DL, Larson EB. Rising use of diagnostic medical imaging in a large integrated health system. *Health Affairs* 2008;27(6): 1491-1502
6. Lysdahl K.B. and Børretzen I. Geographical variation in radiological services: nationwide survey. *BMC Health Services Research*. 2007;7-21
7. Song Y, Skinner J, Bynum J, Sutherland J, Wennberg JE, Fisher ES. Regional Variation in Diagnostic Procedures. *The New England Journal Of Medicine*, 2010. 363(1): 45-53
8. Cislighi C, Giuliani F. Out of pocket sanitario nelle regioni italiane *I quaderni di Monitor*, 2008;22:161-177.
9. Vainieri M. Che cosa influenza la soddisfazione dei cittadini toscani nei servizi territoriali di base? *Salute e Territorio* 2006;156: 137-156
10. Censis. I modelli decisionali nella sanità locale. Roma, 2008.
11. Bhargavan M, Sunshine JH. Utilization of radiology services in the United States: levels and trends in modalities, regions and populations. *Radiology* 2005; 234:824-832.
12. Lysdahl KB, Hofmann BM. What causes increasing and unnecessary use of radiological investigations? A survey of radiologists' perceptions. *BMC Health Services Research* 2009; 9:155
13. Nuti S, Barsanti S. *Il Sistema di valutazione della performance della sanità toscana - REPORT 2009 Società della Salute/Zone-Distretto*. Pisa: Edizioni ETS, 2010.
14. Wennberg EJ. *Tracking medicine*. Oxford: University Press, 2010.
15. Bevan G, Hollinghurst S, Benton P, Spark V, Sanderson H, Franklin D. Using information on variation in rates of supply to question professional discretion in public services. *Financial Accountability & Management* 2004; 20(1):1-17.
16. Lee TH. Turning doctors into leaders. *Harvard Business Review*. 2010; April:50-8.
17. Emery DJ, Forster A.J., Shojania KG, Magnan S. Management of MRI Wait Lists in Canada *Healthcare Policy*. 2009; 4(3)
18. Appleby J, Raleigh V, Frosini F, Bevan G, Gao H, Lyscom T. *Variation in healthcare*. The King's Fund. 2011
19. Nuti S, Vainieri M, Bonini A. Disinvestment for re-allocation: A process to identify priorities in healthcare. *Health Policy* 2010; 95:137-43.
20. Sirm-Snr. *Metodologia di determinazione dei volumi di attività e della produttività dei medici radiologi- Nomenclatore Sirm - Snr Delle Prestazioni Radiologiche*. Genova: OMICRON, 2006.
21. Jonsson S, Lukka K. *Doing interventionist research in management accounting*. Goteborg: Gothenburg Research Institute, 2005.
22. Kasanen E, Lukka K, Siitonen A. The constructive approach in management accounting research. *J Manag Acc Res* 1993;5(Fall):243-64

Formatted: Italian (Italy)
